# Supplementary material for: Ligand/PTC-free intramolecular Heck reaction: synthesis of pyrroloquinoxalines and their evaluation against PDE4/luciferase/oral cancer cell growth in vitro and zebrafish in vivo
Source: Royal Society of Chemistry journal article supplement (doi:10.1039/c3ob41504j), 2013-01-01

IIS-PVB-M-AN-1b in CDCl3  
File No : 20130617\_46

Sample Name :

Data Collected on:  
localhost.localdomain-vnmrs400  
Archive directory:

Sample directory:

Fidfile: 20130617\_46\_IIS-PVB-M-AN-1b\_H1

Pulse Sequence: PROTON (s2pul)  
Solvent: cdcl3  
Data collected on: Jun 17 2013

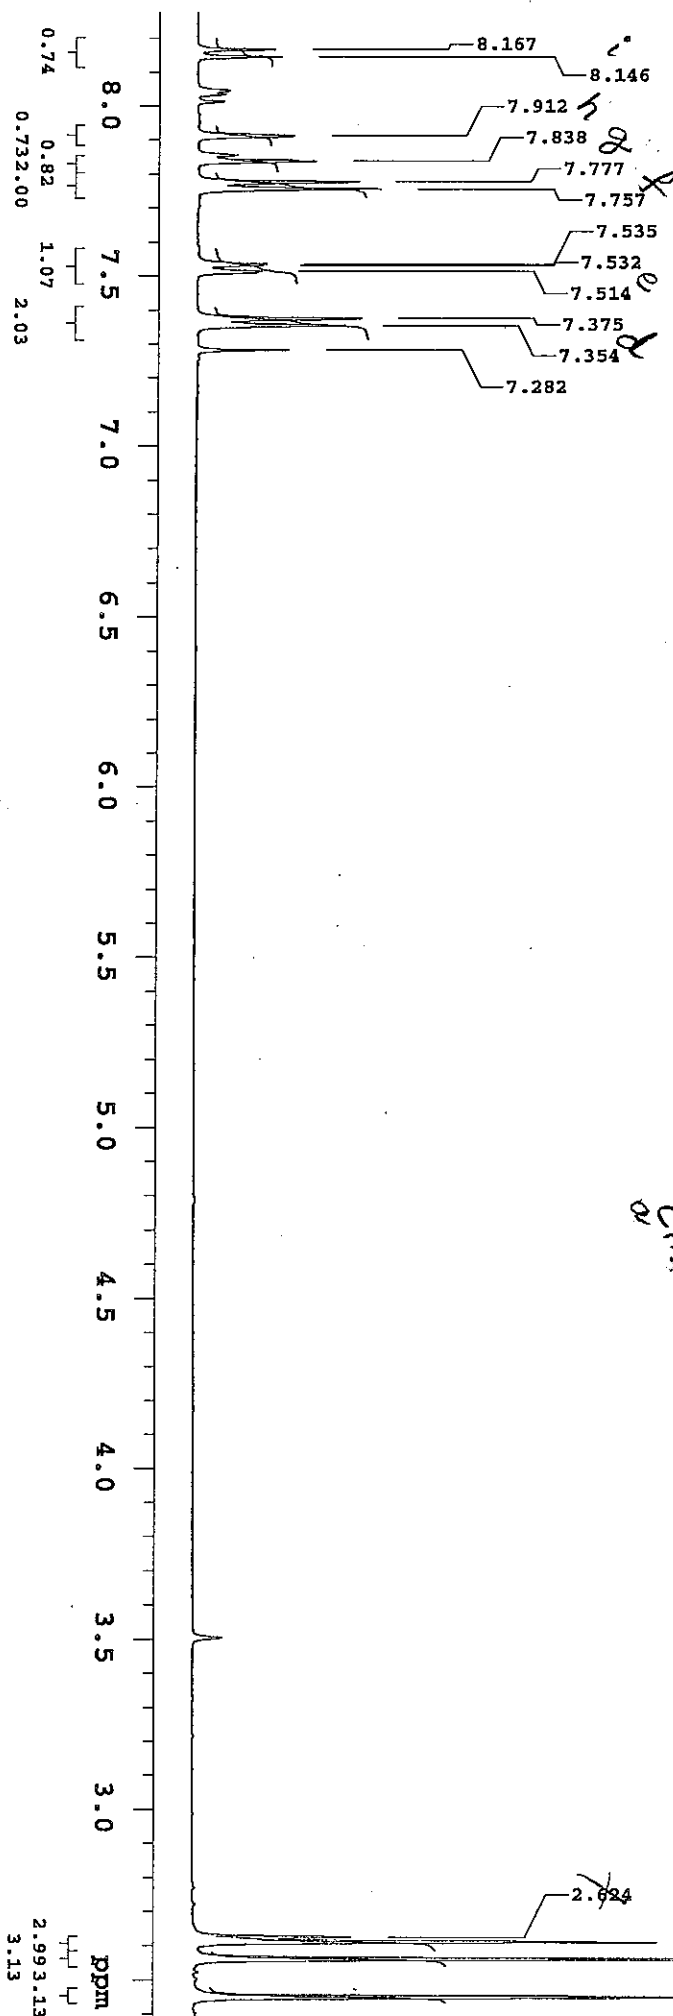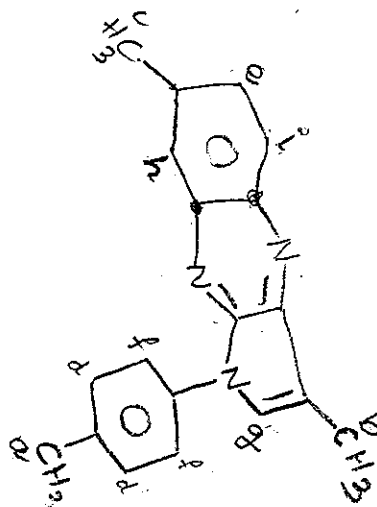

ILS-PVB-M-AN-1b In CDCl3  
gCOSY EXPT.  
File No : 20130621\_1

Sample Name:

Data Collected on:

localhost.localdomain-vnmrs400

Archive directory:

Sample directory:

Fidfile: gCOSY

Pulse Sequence: gCOSY

Solvent: cdcl3

Data collected on: Jun 21 2013

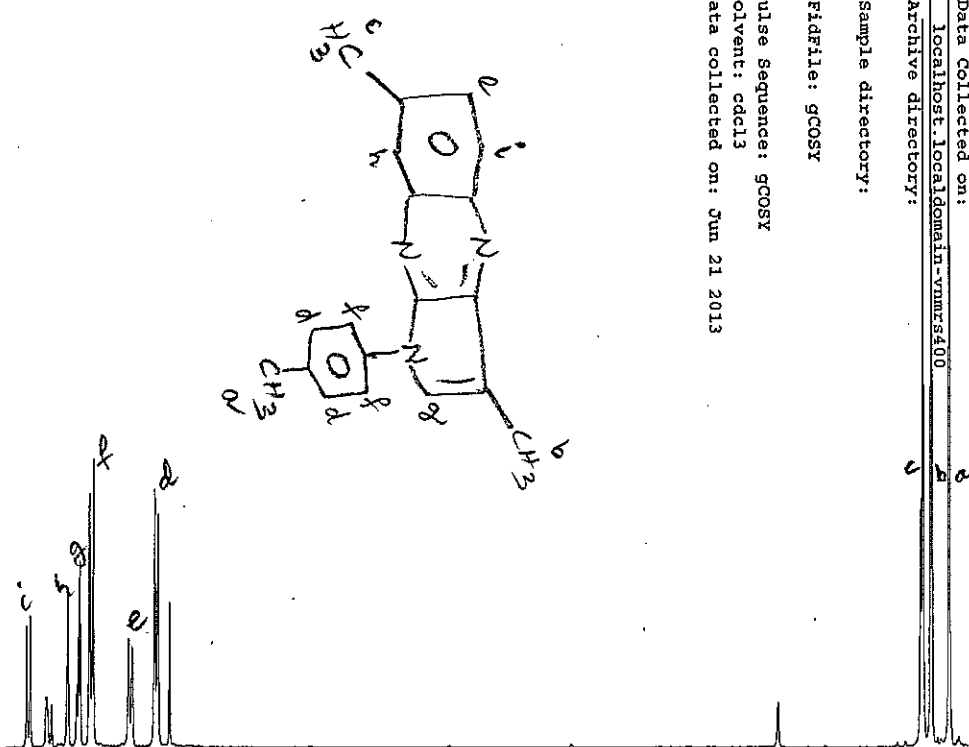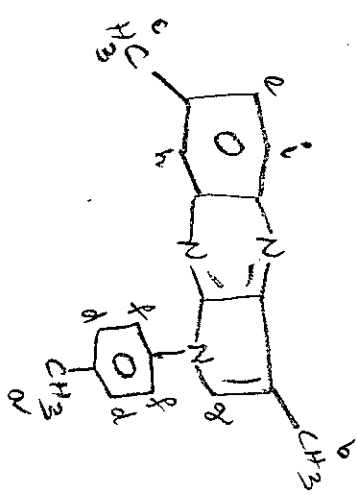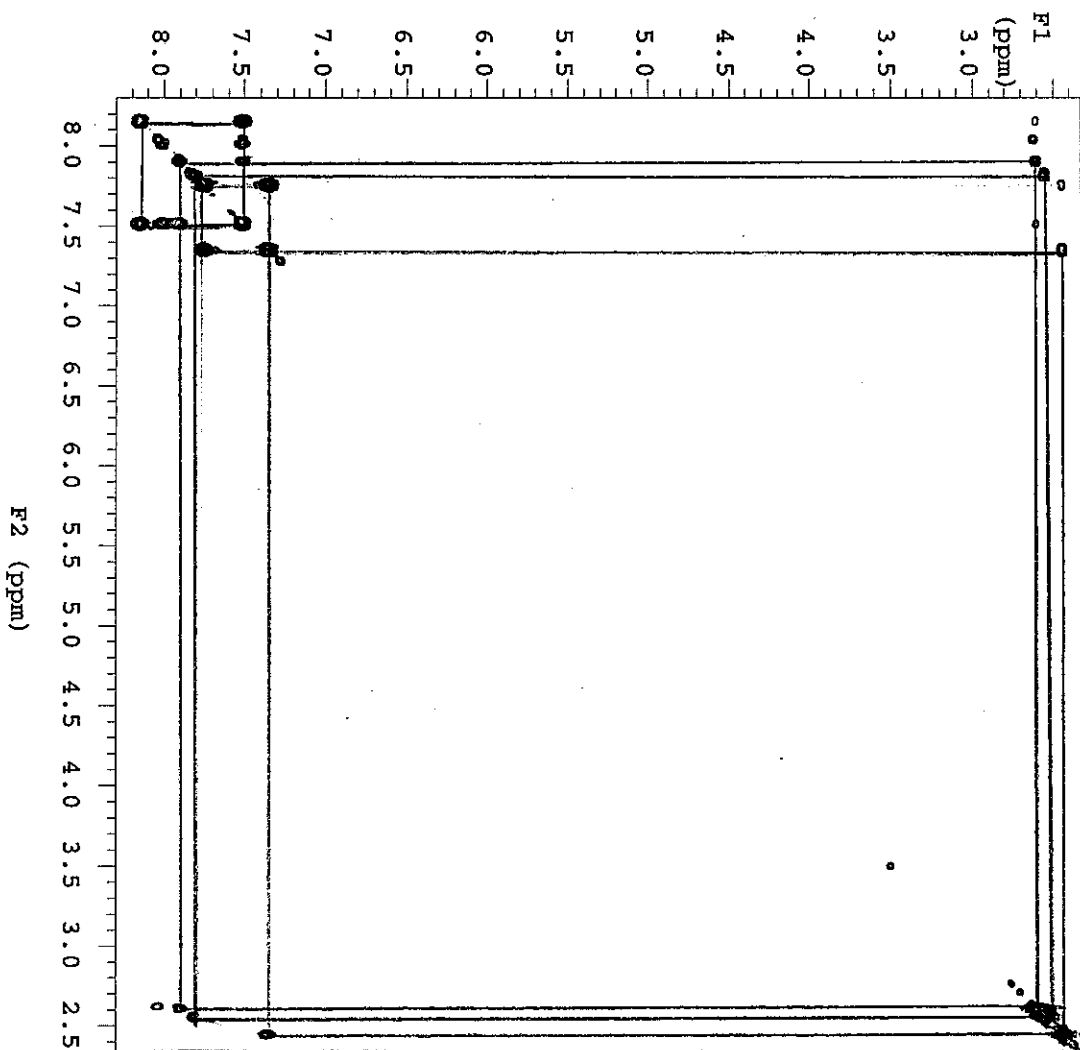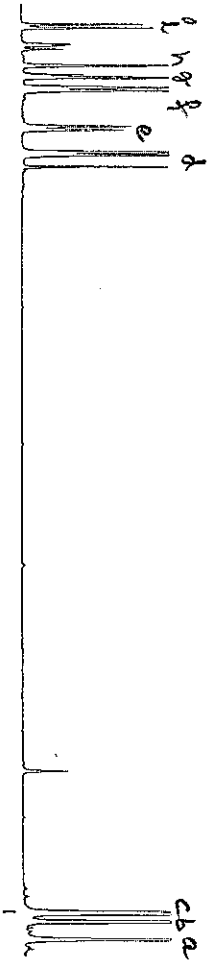

ILS-PVB-N-AN-1b in CDCl3  
gCOSY EXPT.  
File No : 20130621\_1  
Sample Name:  
Data Collected on:  
Localhost: localdomain-ymms400  
Archive directory:  
Sample directory:  
Fidfile: gCOSY  
Pulse Sequence: gCOSY  
Solvent: cdcl3  
Data collected on: Jun 21 2013

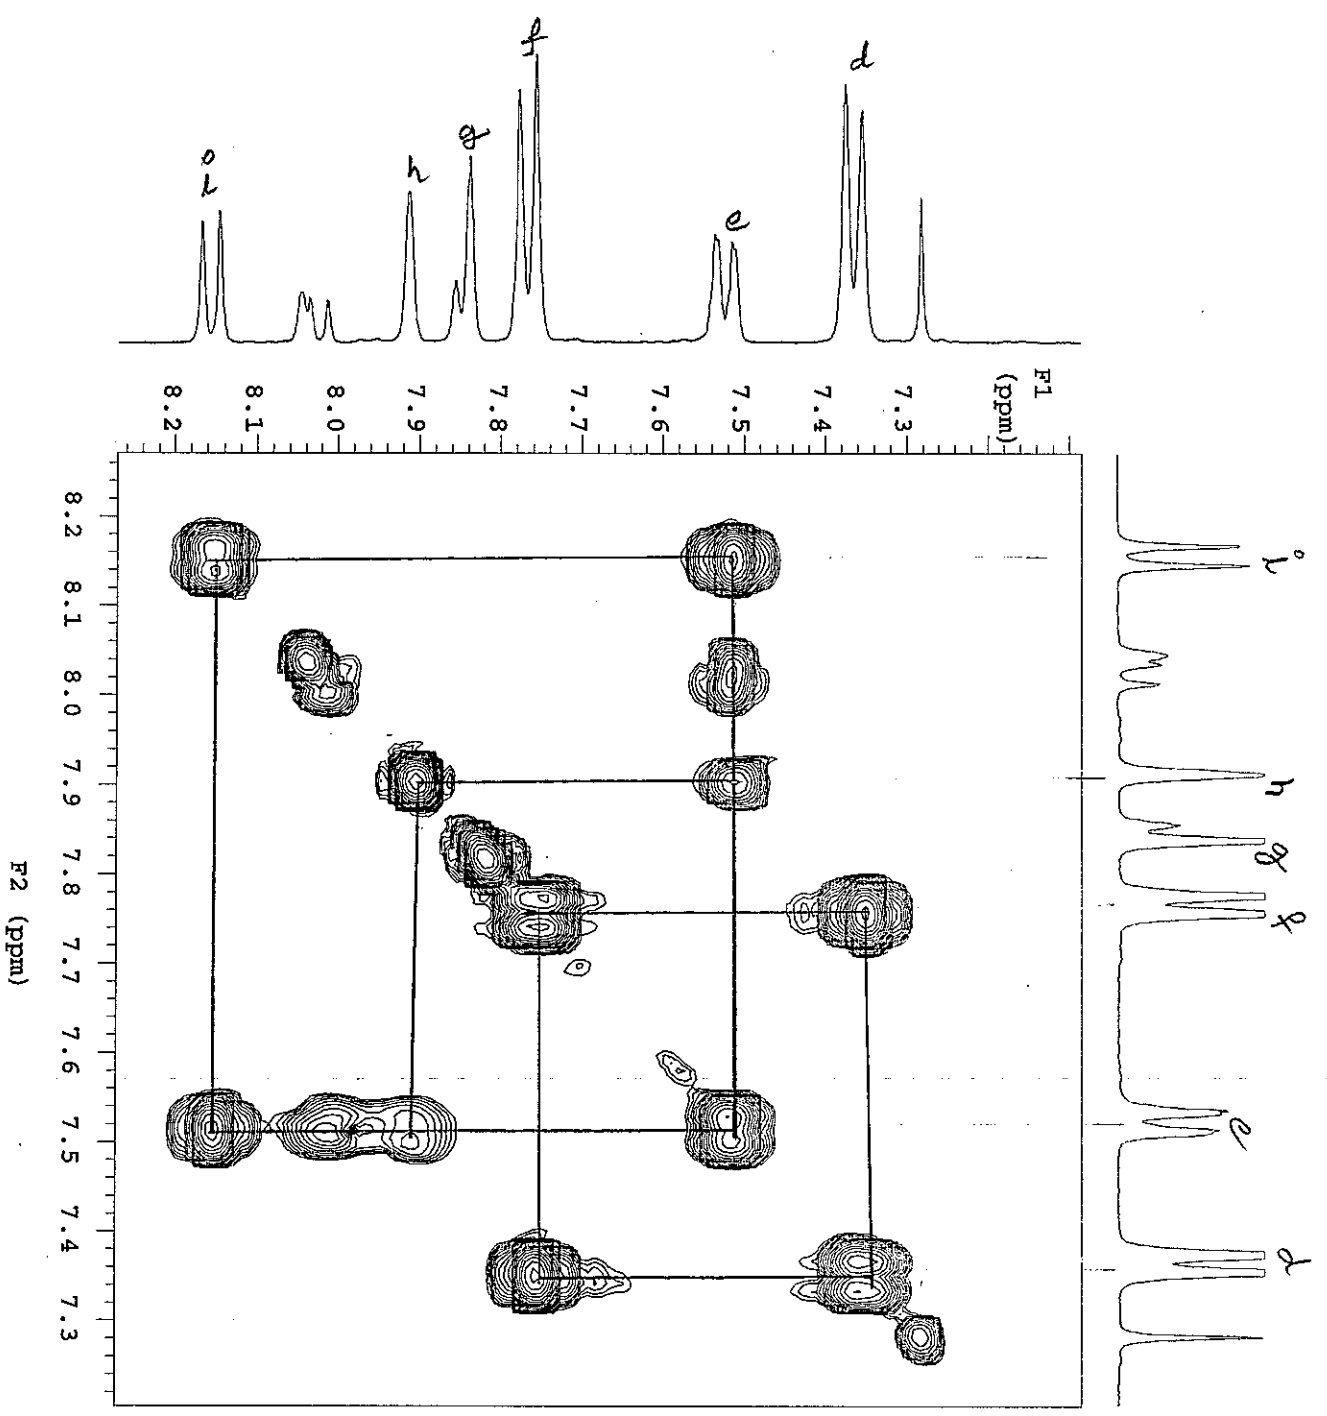

IMS-PVB-M-AN-1b in CDCl3  
HMBC EXPT.  
File No : 20130617\_47

Sample Name:

Data Collected on:  
localhost.localdomain-vmrs400  
Archive directory:

Sample directory:

Fidfile: 20130617\_47\_IMS-PVB-M-AN-1b\_HMBC

Pulse Sequence: ghmecad

Solvent: cdcl3

Data collected on: Jun 17 2013

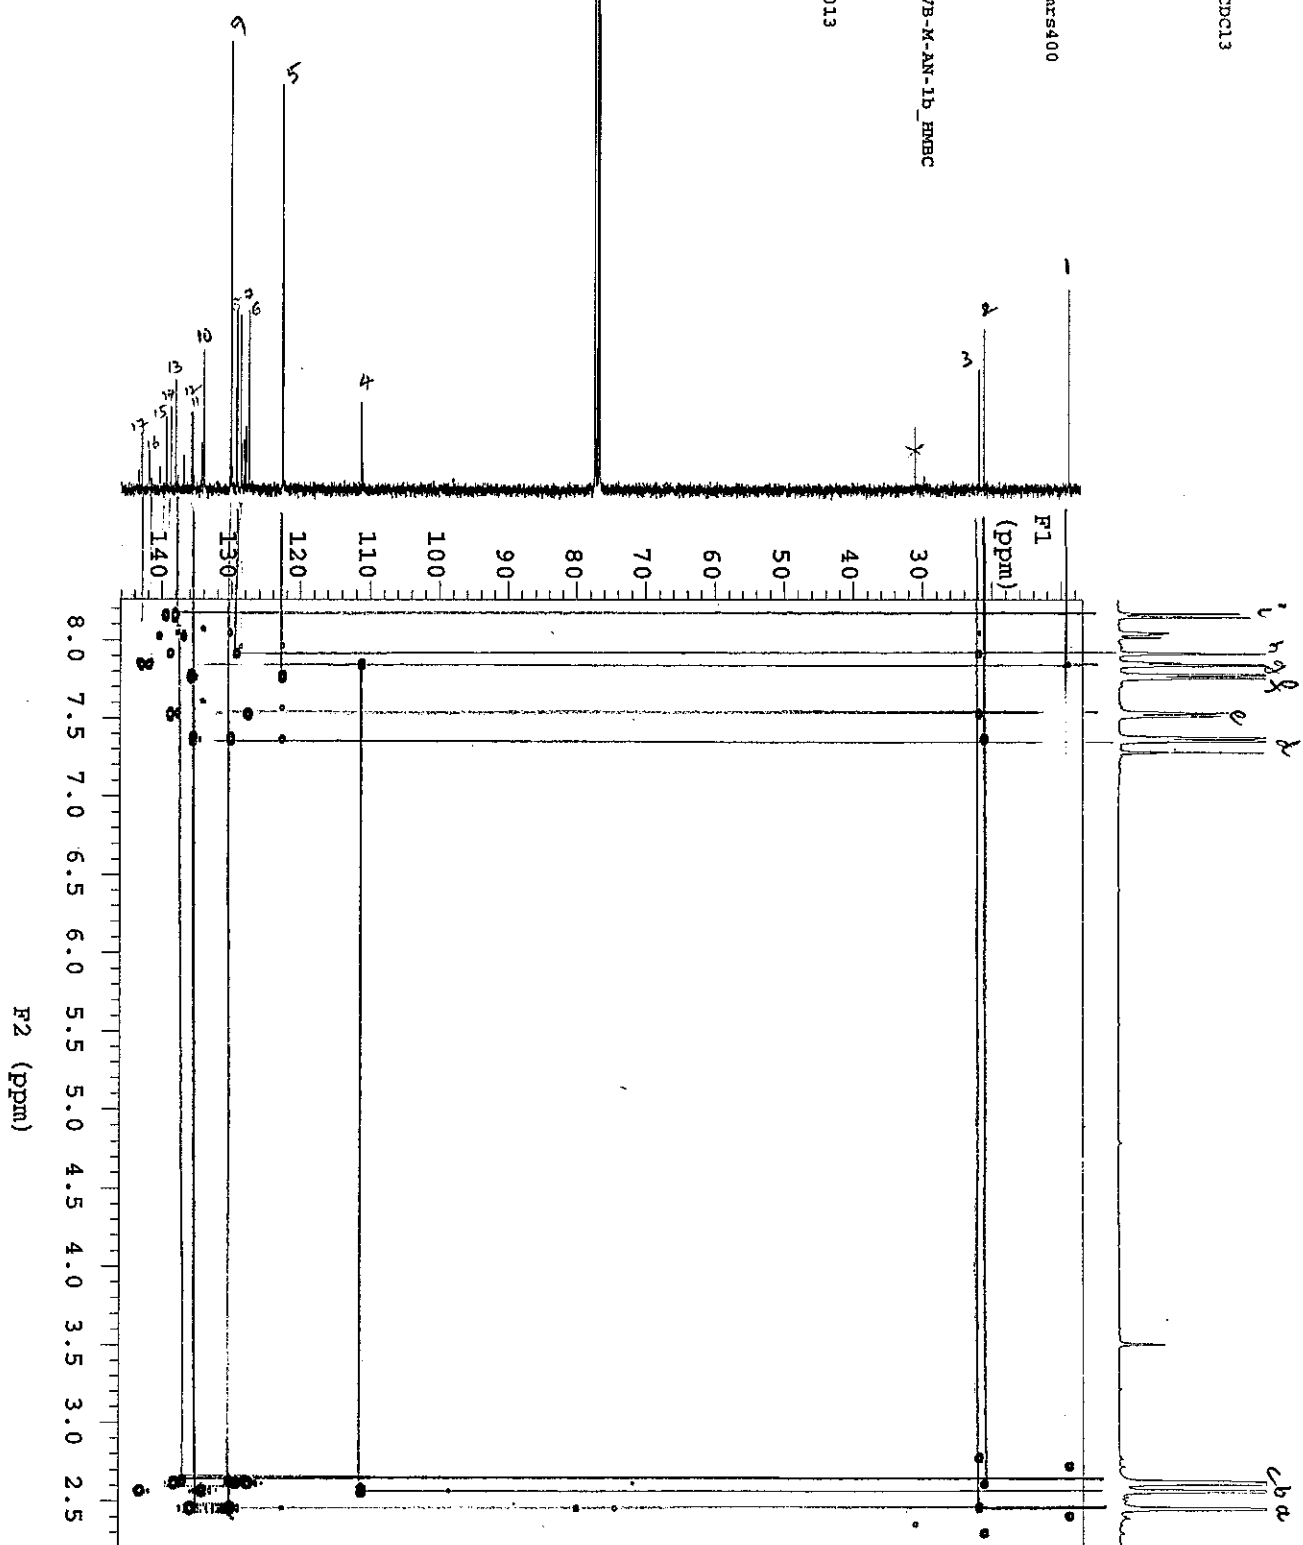

ILS-PVB-M-AN-1b 1n CDCl3  
HMBC EXPT.  
File No : 20130617\_47  
Sample Name:

Data Collected on:  
localhost.localdomain-vmrs400  
Archive directory:

Sample directory:

FidFile: 20130617\_47\_ILS-PVB-M-AN-1b\_HMBC

Pulse Sequence: ghmhcad

Solvent: cdcl3

Data collected on: Jun 17 2013

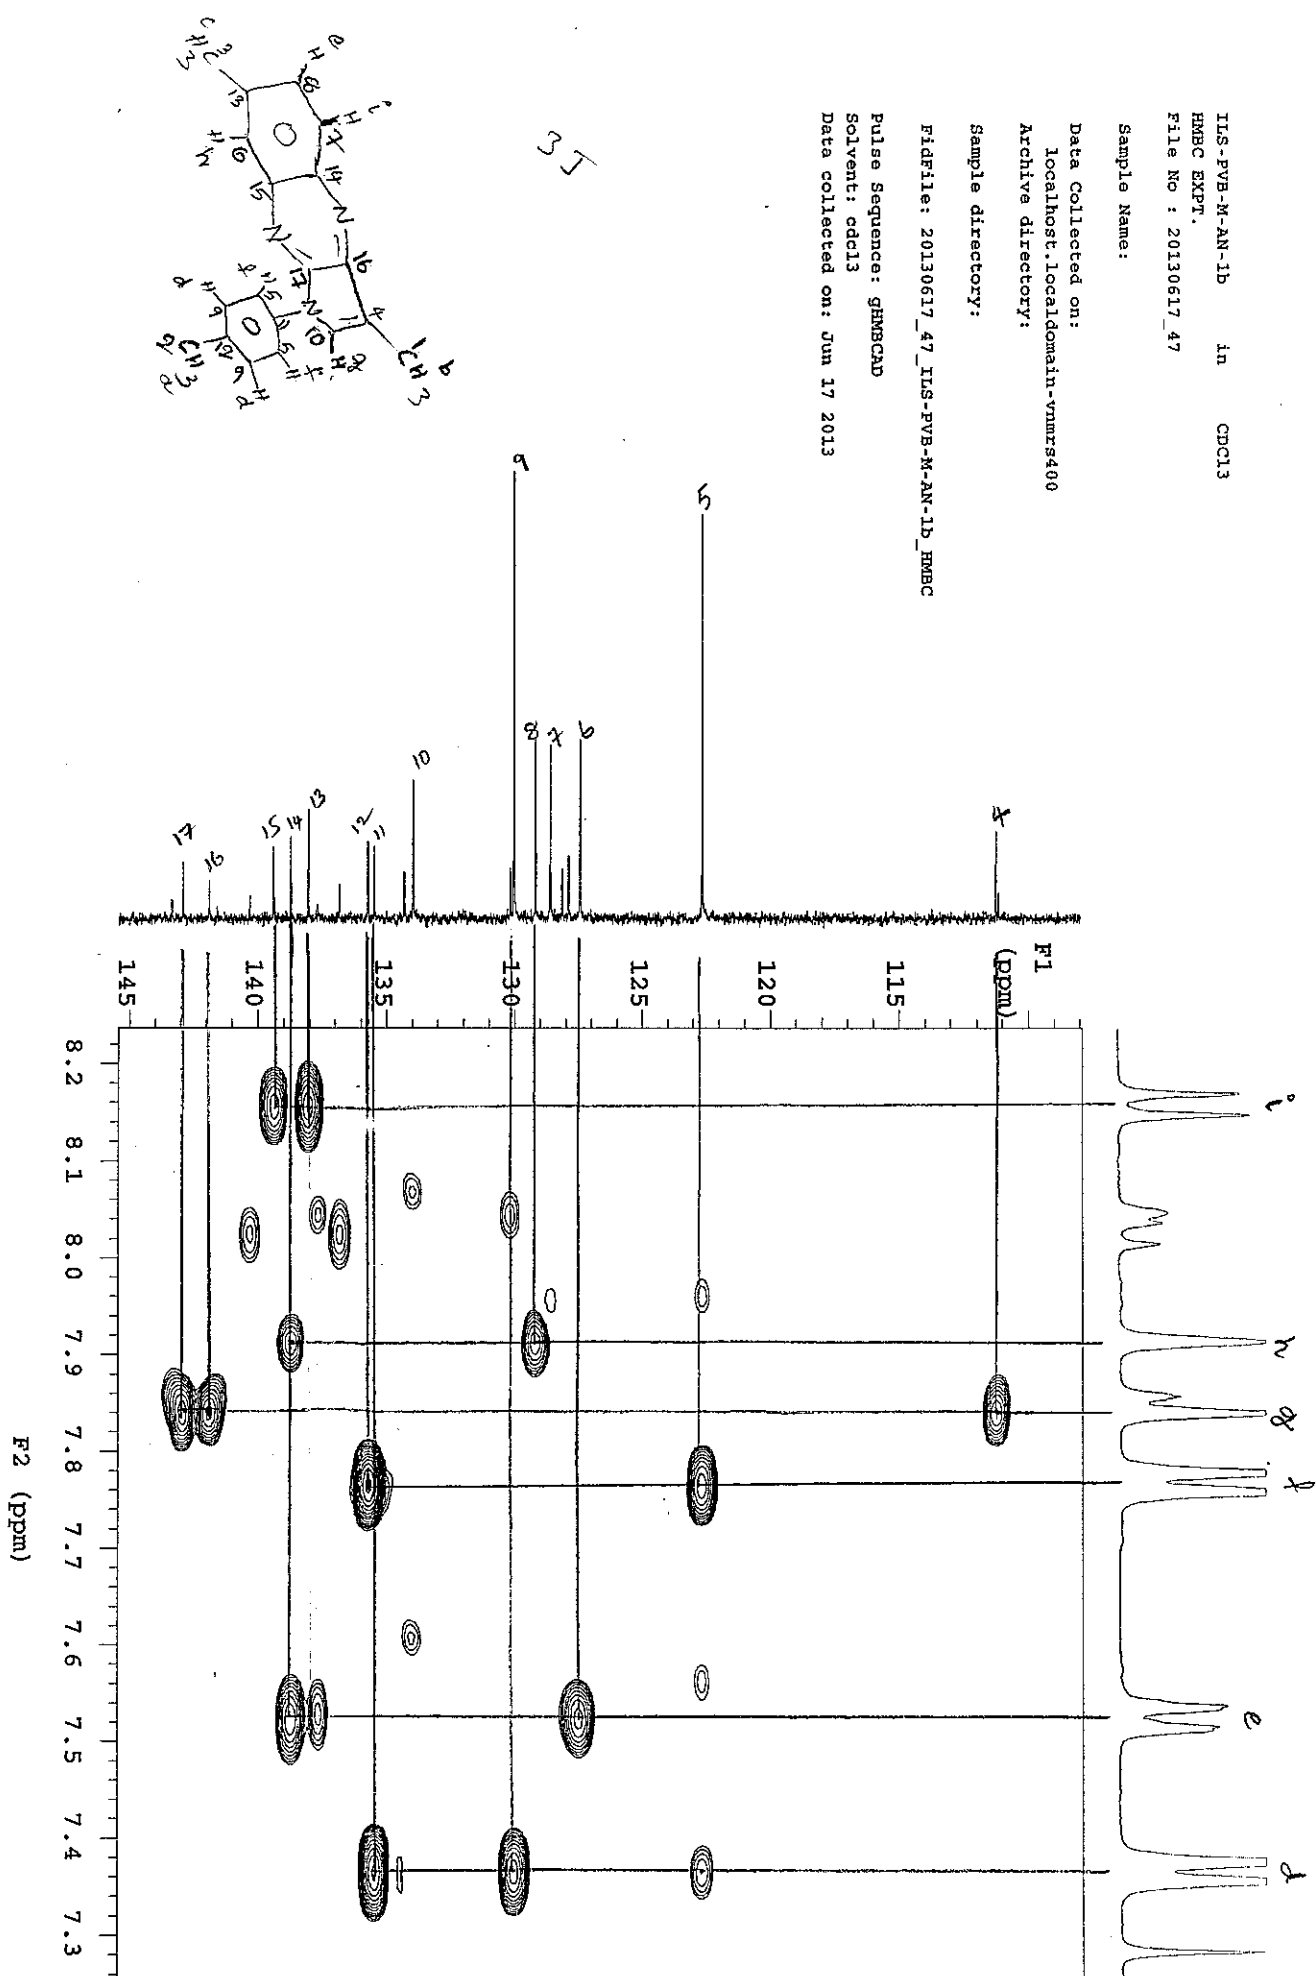

ILS-PVB-M-AN-1b in CDCl3  
GHSQC EXPT.  
File No : 20130621\_21

Sample Name:

Data Collected on:  
localhost.localdomain-vnmrs400  
Archive directory:

Sample directory:

Fidfile: GHSQCAD

Pulse Sequence: GHSQCAD

Solvent: cdcl3

Data collected on: Jun 21 2013

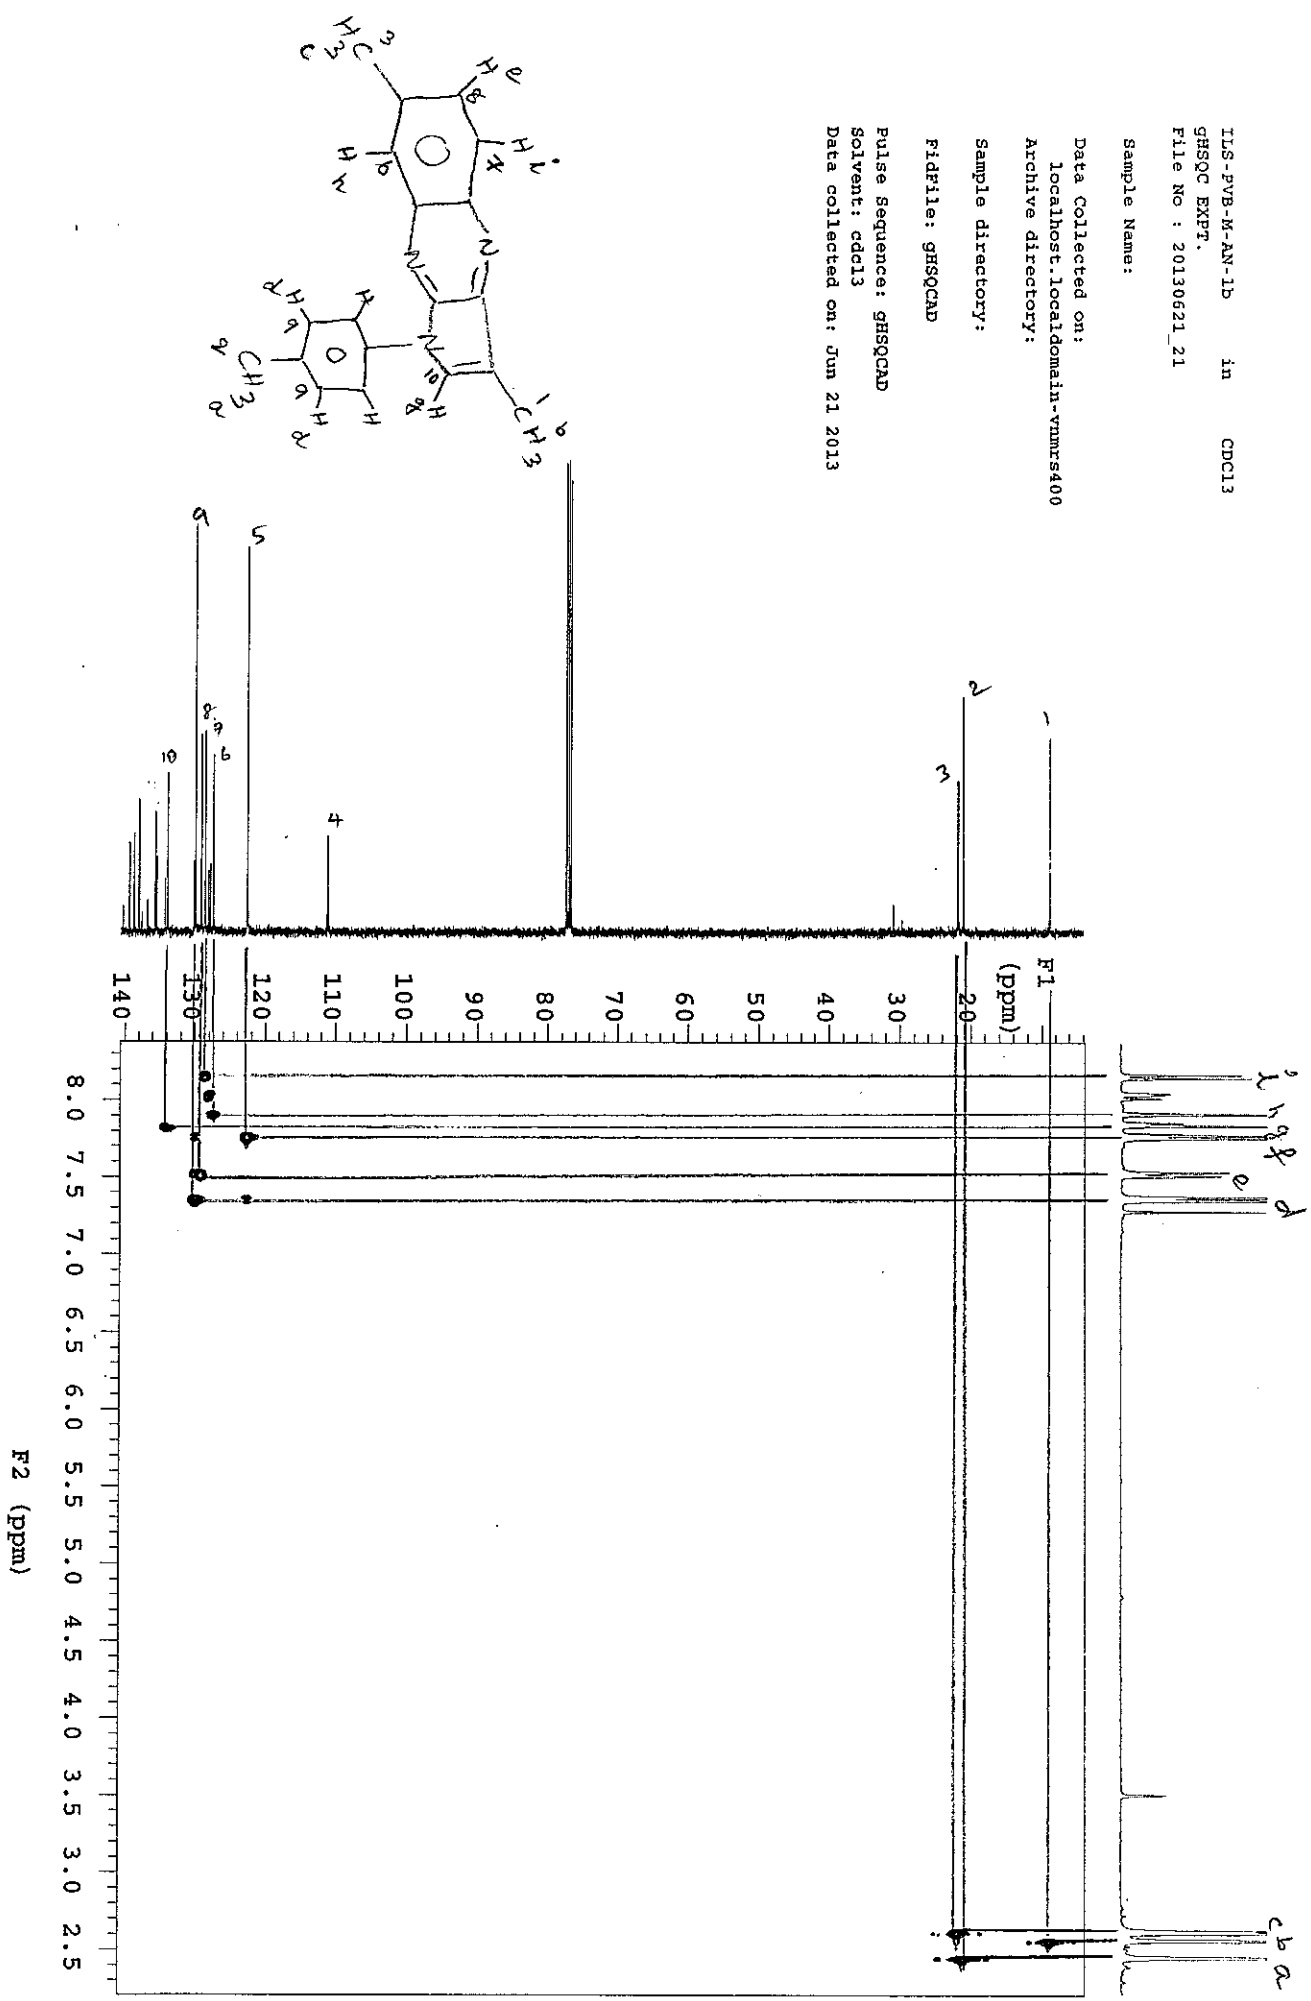

IMS-PVB-M-AN-1b in CDCl3  
gHSQC EXPT.  
File No : 20130621\_21

Sample Name:

Data Collected on:  
localhost.localdomain-vmrs400  
Archive directory:

Sample directory:

Fidfile: gHSQCAD

Pulse Sequence: gHSQCAD

Solvent: cdcl3

Data collected on: Jun 21 2013

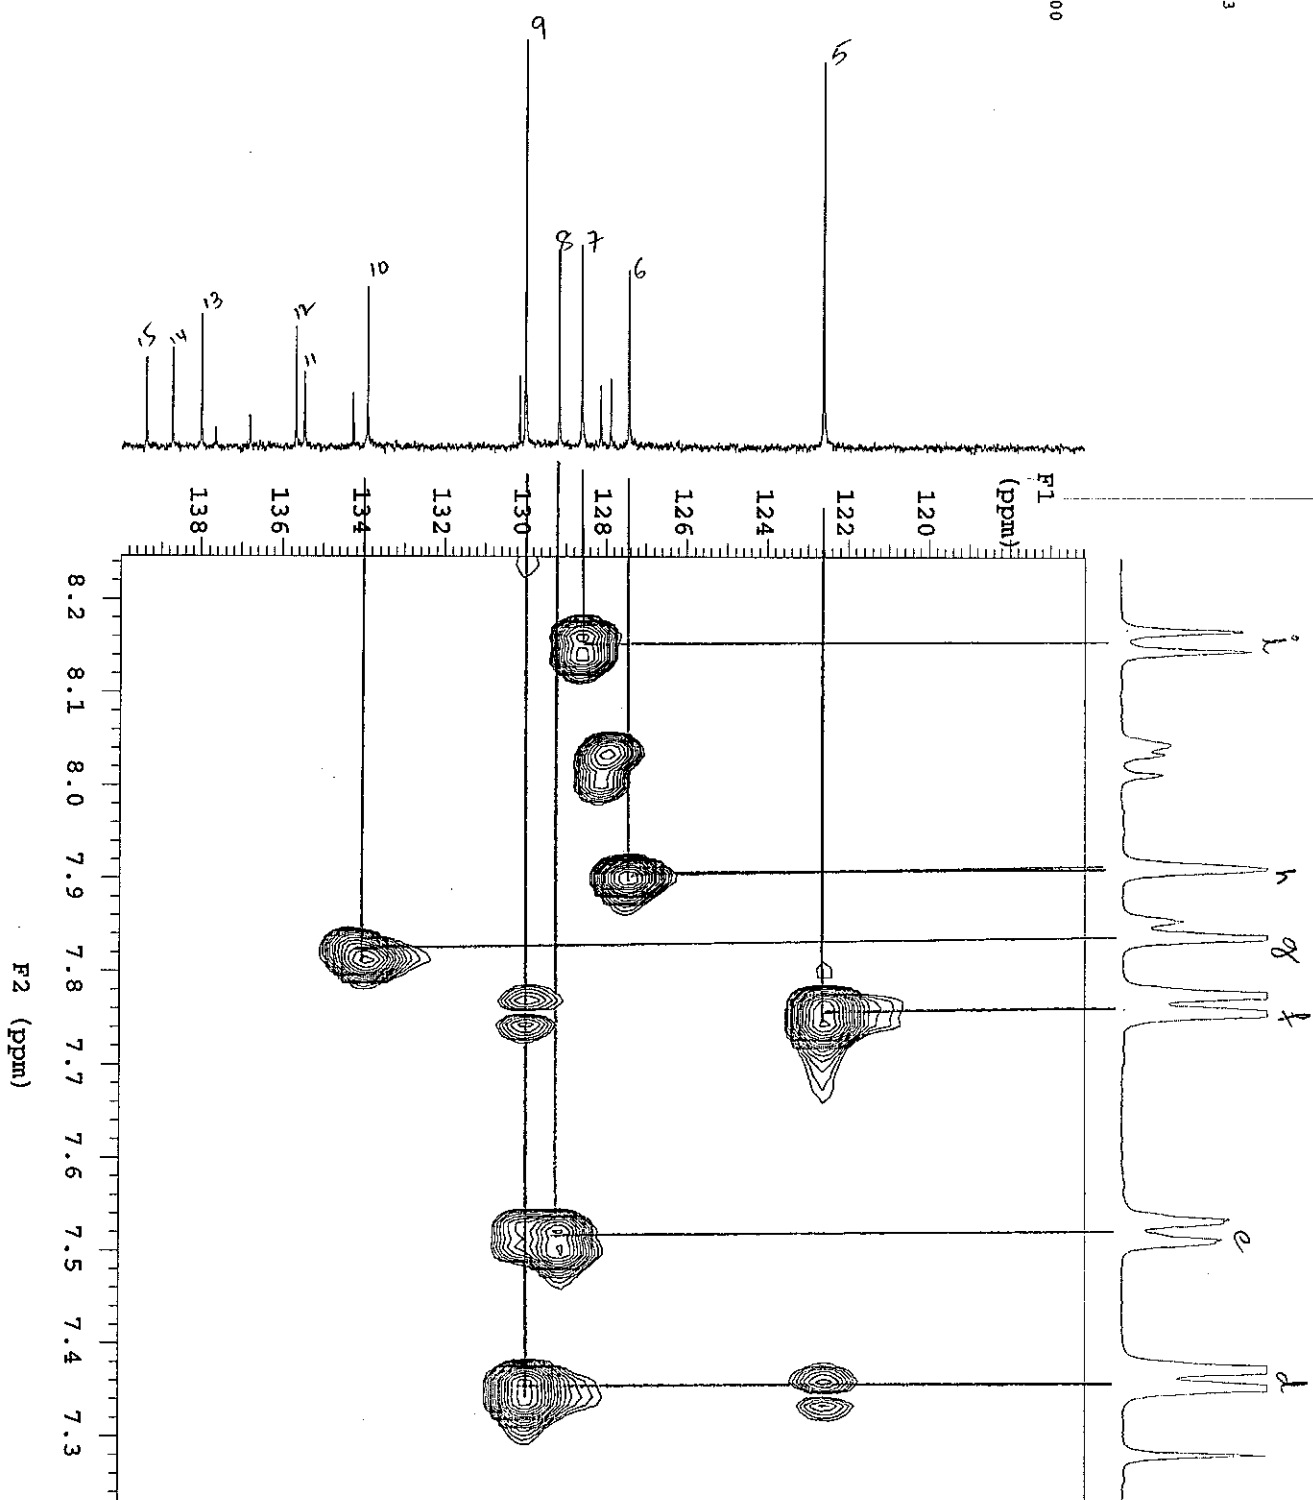

Supplement: c3ob41504j_2.pdf [file c3ob41504j_2.pdf]
