# Supplementary material for: Ligand/PTC-free intramolecular Heck reaction: synthesis of pyrroloquinoxalines and their evaluation against PDE4/luciferase/oral cancer cell growth in vitro and zebrafish in vivo
Source: Royal Society of Chemistry journal article supplement (doi:10.1039/c3ob41504j), 2013-01-01
Supplement: c3ob41504j_3.pdf [file c3ob41504j_3.pdf]

Copies of HPLC

COSMIC DISCOVERIES @ ILS  
HPLC ANALYSIS REPORT

|                 |                                                            |           |           |
|-----------------|------------------------------------------------------------|-----------|-----------|
| Injection Date  | : Fri, 7. Sep. 2012                                        | Seq Line  | : 4       |
| Sample Name     | : ILS-PVB-AN-1A                                            | Location  | : Vial 44 |
| Acq Operator    | : SRI KRISHNA VARMA                                        | Inj. No.  | : 1       |
| Acq. Method     | : D:\Chem32\1\DATA\070912-MC 2012-09-07 18-31-22\C-18 ->   | Inj. Vol. | : 4 µl    |
| Analysis Method | : D:\CHEM32\1\METHODS\C-18 A50B50-GM.M                     |           |           |
| Method Info     | : Column : Symmetry C-18 75*4.6mm 3.5µm                    |           |           |
|                 | Mobile phase: A) 0.1% HCOOH in water , B) ACN (Isocratic ) |           |           |
|                 | T/B%0/50,1/50,3/98,10/98,10.5/50,12/50                     |           |           |
|                 | Flow:1.0 ml/min, Diluent: ACN:WATER(80:20)                 |           |           |

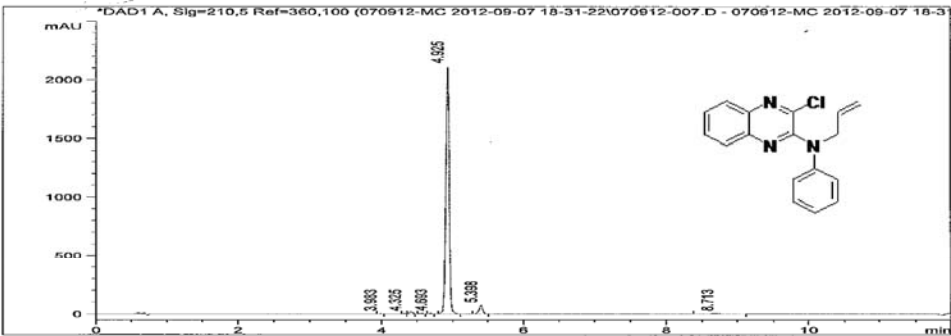

Signal 1: DAD1 A, Sig=210,5 Ref=360,100

| Peak # | RT [min] | Area     | Area % |
|--------|----------|----------|--------|
| 1      | 3.983    | 5.555    | 0.073  |
| 2      | 4.325    | 2.972    | 0.039  |
| 3      | 4.414    | 48.626   | 0.640  |
| 4      | 4.559    | 13.624   | 0.179  |
| 5      | 4.693    | 10.068   | 0.133  |
| 6      | 4.925    | 7192.250 | 94.655 |
| 7      | 5.398    | 269.887  | 3.552  |
| 8      | 8.713    | 55.392   | 0.729  |

\*\*\* End of Report \*\*\*

COSMIC DISCOVERIES @ ILS  
HPLC ANALYSIS REPORT

|                 |                                                             |           |           |
|-----------------|-------------------------------------------------------------|-----------|-----------|
| Injection Date  | : Mon, 27. Aug. 2012                                        | Seq Line  | : 0       |
| Sample Name     | : ILS-PVD-METH-1A                                           | Location  | : Vial 82 |
| Acq Operator    | : SRI KRISHNA VARMA                                         | Inj. No.  | : 0       |
| Acq. Method     | : D:\CHEM32\1\METHODS\C-18 A50B50-GM.M                      | Inj. Vol. | : 5 µl    |
| Analysis Method | : D:\CHEM32\1\METHODS\C-18 A50B50-GM.M                      |           |           |
| Method Info     | : Column : Symmetry C-18 75*4.6mm 3.5µm                     |           |           |
|                 | : Mobile phase: A)0.1% HCOOH in water , B) ACN (Isocratic ) |           |           |
|                 | : T/B%0/50,1/50,3/98,10/98,10.5/50,12/50                    |           |           |
|                 | : Flow:1.0 ml/min, Diluent: ACN:WATER(80:20)                |           |           |

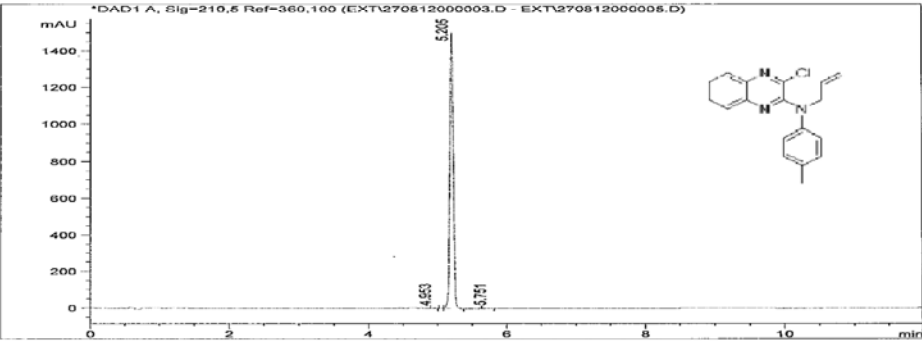

Signal 1: DAD1 A, Sig=210,5 Ref=360,100

| Peak # | RT [min] | Area     | Area % |
|--------|----------|----------|--------|
| 1      | 4.953    | 3.073    | 0.061  |
| 2      | 5.080    | 5.062    | 0.100  |
| 3      | 5.205    | 5055.910 | 99.696 |
| 4      | 5.751    | 7.266    | 0.143  |

\*\*\* End of Report \*\*\*

COSMIC DISCOVERIES @ ILS  
HPLC ANALYSIS REPORT

Injection Date : Wed, 8. Aug. 2012      Seq Line : 0  
Sample Name : ILS-PVB-ALK-1      Location : Vial 43  
Acq Operator : SRI KRISHNA VARMA      Inj. No. : 0  
Acq. Method : D:\CHEM32\1\METHODS\C-18 A60B40G.M      Inj. Vol. : 5 µl  
Analysis Method : D:\CHEM32\1\METHODS\C-18 A60B40G.M  
Method Info : Column : Symmetry C-18 75\*4.6mm,3.5µm  
Mobile phase: A) 0.1% HCOOH in water , B) ACN (GRADIENT)  
T/%B : 0/40,0.5/40,3/98,10/98,10.5/40,12/40.  
Flow:1.0 ml/min Diluent : ACN:Water:MeOH(80:10:10)

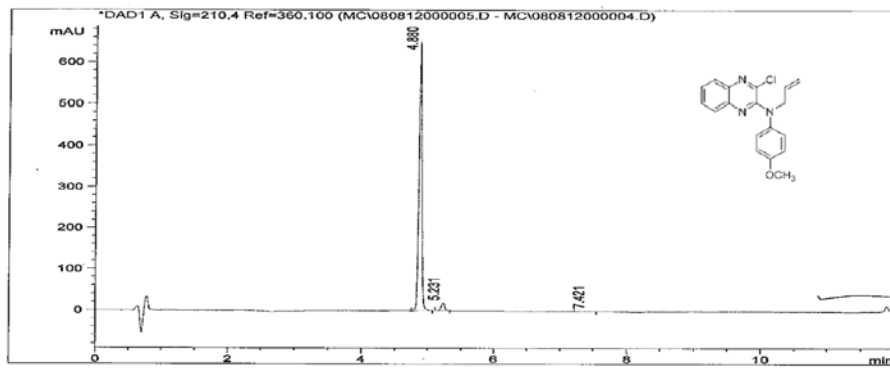

Signal 1: DAD1 A, Sig=210,4 Ref=360,100

| Peak # | RT [min] | Width [min] | Area     | Area % | Name |
|--------|----------|-------------|----------|--------|------|
| 1      | 4.880    | 0.051       | 2000.542 | 96.438 |      |
| 2      | 5.231    | 0.060       | 65.718   | 3.168  |      |
| 3      | 7.421    | 0.108       | 8.170    | 0.394  |      |

\*\*\* End of Report \*\*\*

COSMIC DISCOVERIES @ ILS  
HPLC ANALYSIS REPORT

|                 |                                                           |           |          |
|-----------------|-----------------------------------------------------------|-----------|----------|
| Injection Date  | : Mon, 3. Sep. 2012                                       | Seq Line  | : 0      |
| Sample Name     | : ILS-PVD-F-1                                             | Location  | : Vial 4 |
| Acq Operator    | : SRI KRISHNA VARMA                                       | Inj. No.  | : 0      |
| Acq. Method     | : D:\CHEM32\1\METHODS\C-18 A90B10G.M                      | Inj. Vol. | : 3 µl   |
| Analysis Method | : D:\CHEM32\1\METHODS\C-18 A90B10G.M                      |           |          |
| Method Info     | : Column : Symmetry C-18 75*4.6mm 3.5µm                   |           |          |
|                 | Mobile phase: A) 0.1% HCOOH in Water , B) ACN (gradient ) |           |          |
|                 | T/B%:0/10,0.5/10,3/98,10/98,10.5/10,12/10.                |           |          |
|                 | Flow: 1.0 ml/min, Diluent: ACN:Water(90:10)               |           |          |

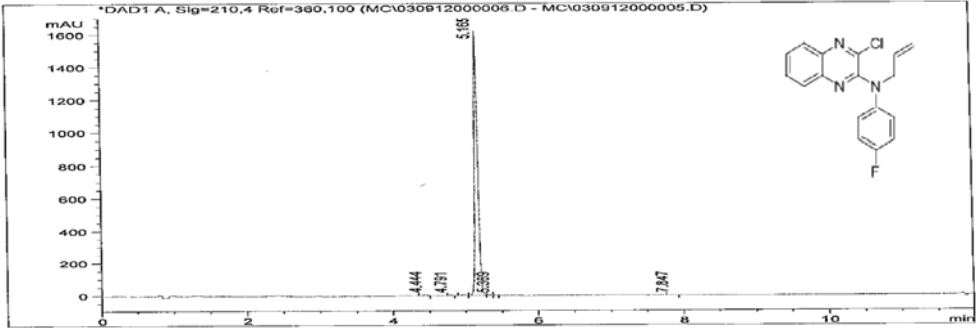

Signal 1: DAD1 A, Sig=210,4 Ref=360,100

| Peak # | RT [min] | Area     | Area % |
|--------|----------|----------|--------|
| 1      | 4.444    | 23.400   | 0.423  |
| 2      | 4.791    | 13.710   | 0.248  |
| 3      | 4.972    | 23.229   | 0.420  |
| 4      | 5.165    | 5440.318 | 98.494 |
| 5      | 5.288    | 15.678   | 0.283  |
| 6      | 5.369    | 4.778    | 0.086  |
| 7      | 7.847    | 2.503    | 0.045  |

\*\*\* End of Report \*\*\*

COSMIC DISCOVERIES 8 ILS  
HPLC ANALYSIS REPORT

|                 |                                                             |           |           |
|-----------------|-------------------------------------------------------------|-----------|-----------|
| Injection Date  | : Thu, 10. Jan. 2013                                        | Seq Line  | : 0       |
| Sample Name     | : ILS-PVB-CL-AN-19                                          | Location  | : Vial 51 |
| Acq Operator    | : VARMA                                                     | Inj. No.  | : 0       |
| Acq. Method     | : D:\CHEM32\1\METHODS\C-18 A50B50-GM.M                      | Inj. Vol. | : 5 µl    |
| Analysis Method | : D:\CHEM32\1\METHODS\C-18 A50B50-GM.M                      |           |           |
| Method Info     | : Column : Symmetry C-18 75*4.6mm,3.5µm                     |           |           |
|                 | : Mobile phase: A) 0.1% HCOOH in Water , B) ACN (gradient ) |           |           |
|                 | : T/B: 0/50, 0.5/50, 6/98, 10/98, 10.5/50, 12/50            |           |           |
|                 | : Flow: 1.0 ml/min, Diluent: ACN:Water(90:10)               |           |           |

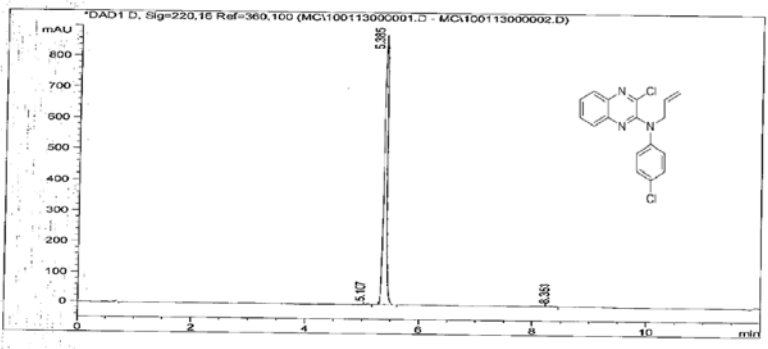

Signal 1: DAD1.D, Sig=220,16 Ref=360,100

| Peak # | RT [min] | Area     | Area % |
|--------|----------|----------|--------|
| 1      | 5.107    | 6.284    | 0.184  |
| 2      | 5.385    | 3404.397 | 99.674 |
| 3      | 8.353    | 4.866    | 0.142  |

COSMIC DISCOVERIES @ ILS  
HPLC ANALYSIS REPORT

Injection Date : Fri, 31 Aug. 2012 Seq Line : 0  
Sample Name : ILS-EVB-ALK-2 Location : Vial 3  
Acq Operator : SRI KRISHNA VARMA Inj. No. : 0  
Acq. Method : D:\CHEM32\1\METHODS\C-18 A50B50-QM.M Inj. Vol. : 5 µl  
Analysis Method : D:\CHEM32\1\METHODS\C-18 A50B50-QM.M  
Method Info : Column : Symmetry C-18 75\*4.6mm 3.5µm  
Mobile phase: A) 0.1% HCOOH in water , B) ACN (gradient )  
T/Bt:0/50,1.0/50,4/98,10/98,10.5/50,12/50  
Flow:1.0 ml/min Diluent: ACN:WATER(80:20)

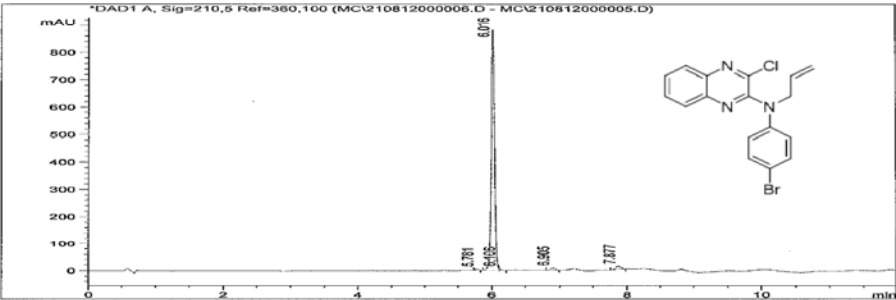

Signal 1: DAD1 A, Sig=210,5 Ref=360,100

| Peak # | RT [min] | Width [min] | Area     | Area % | Name |
|--------|----------|-------------|----------|--------|------|
| 1      | 5.781    | 0.048       | 11.463   | 0.365  |      |
| 2      | 6.016    | 0.056       | 3020.662 | 96.290 |      |
| 3      | 6.106    | 0.022       | 7.983    | 0.254  |      |
| 4      | 6.905    | 0.070       | 33.487   | 1.067  |      |
| 5      | 7.877    | 0.092       | 63.454   | 2.023  |      |

\*\*\* End of Report \*\*\*

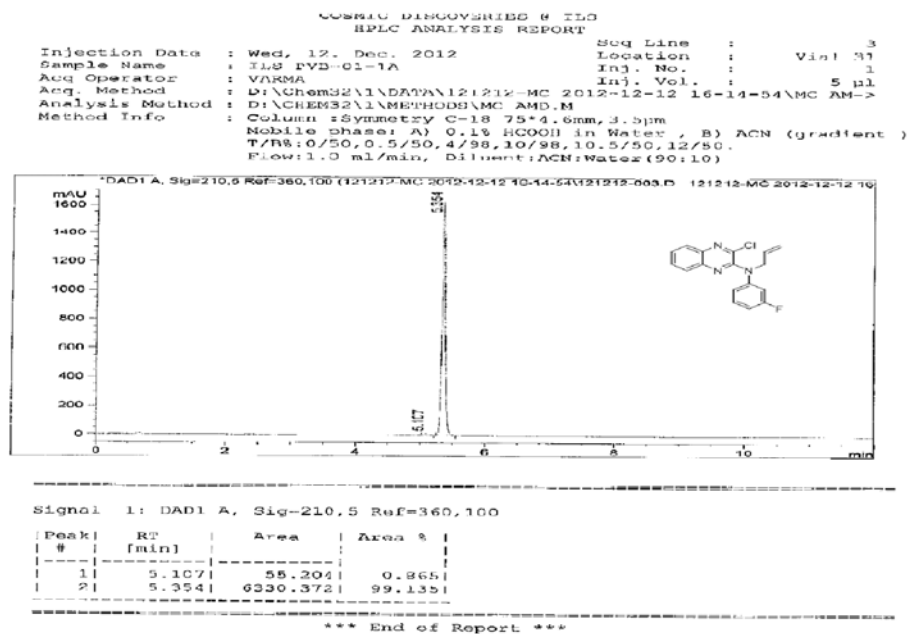

| Peak # | RT [min] | Area      | Area % |
|--------|----------|-----------|--------|
| 1      | 4.162    | 11.482    | 0.097  |
| 2      | 4.553    | 8.838     | 0.075  |
| 3      | 4.718    | 4.212     | 0.036  |
| 4      | 4.956    | 26.984    | 0.228  |
| 5      | 5.108    | 10772.528 | 91.151 |
| 6      | 5.598    | 804.739   | 6.807  |
| 7      | 5.900    | 23.666    | 0.200  |
| 8      | 6.024    | 3.627     | 0.031  |
| 9      | 6.231    | 17.074    | 0.144  |
| 10     | 7.252    | 22.111    | 0.211  |
| 11     | 7.724    | 27.284    | 0.231  |
| 12     | 8.060    | 34.184    | 0.289  |
| 13     | 8.560    | 61.245    | 0.518  |



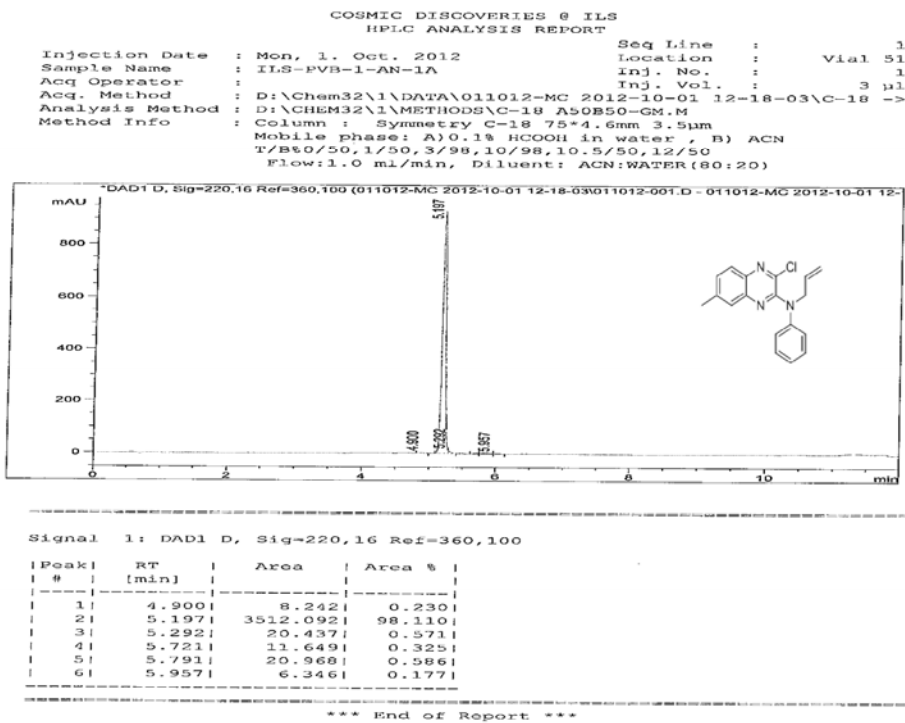

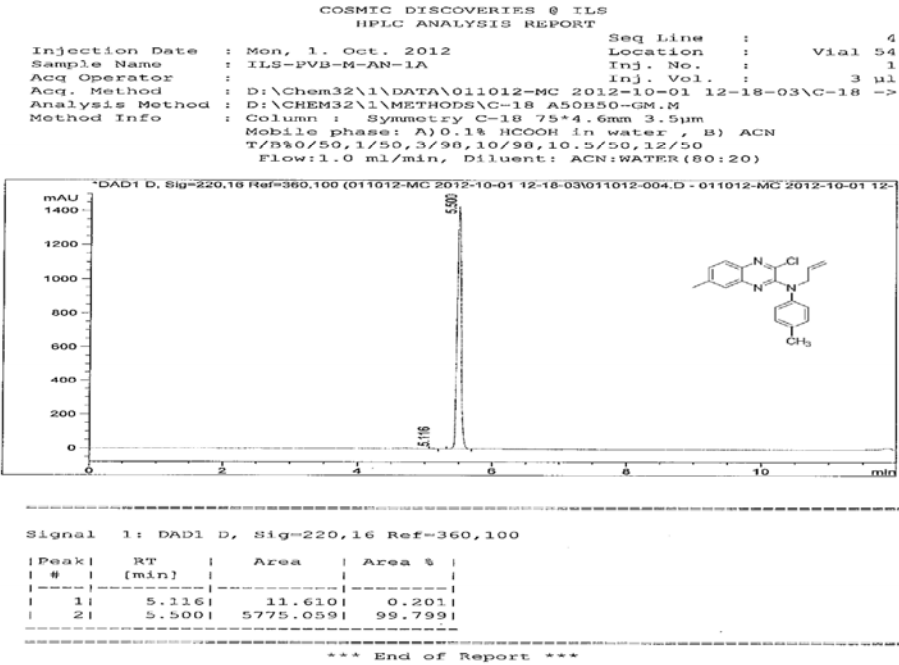

COSMIC DISCOVERIES @ ILS  
HPLC ANALYSIS REPORT

|                 |                                                |           |           |
|-----------------|------------------------------------------------|-----------|-----------|
| Injection Date  | : Men, 8. Oct. 2012                            | Seq Line  | : 0       |
| Sample Name     | : ILS-PVB-MO-AN-1A                             | Location  | : Vial 31 |
| Acq Operator    | : VARMA                                        | Inj. No.  | : 0       |
| Acq. Method     | : D:\CHEM32\1\METHODS\C-18 A50B50-GM.M         | Inj. Vol. | : 5 µl    |
| Analysis Method | : D:\CHEM32\1\METHODS\C-18 A50B50-GM.M         |           |           |
| Method Info     | : Column : Symmetry C-18 75*4.6mm 3.5µm        |           |           |
|                 | : Mobile phase: A) 0.1% HCOOH in water, B) ACN |           |           |
|                 | : T/R: 0/50, 1/50, 3/98, 10/98, 10.5/50, 12/50 |           |           |
|                 | : Flow: 1.0 ml/min, Diluent: ACN:WATER (80:20) |           |           |

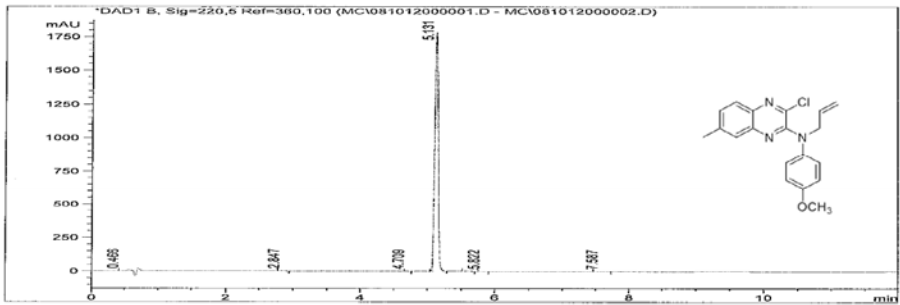

Signal 1: DAD1 B, Sig=220,5 Ref=360,100

| Peak # | RT [min] | Area     | Area % |
|--------|----------|----------|--------|
| 1      | 0.466    | 6.855    | 0.111  |
| 2      | 2.847    | 19.825   | 0.321  |
| 3      | 4.709    | 3.980    | 0.064  |
| 4      | 5.311    | 6122.680 | 99.199 |
| 5      | 5.593    | 9.266    | 0.150  |
| 6      | 5.822    | 1.853    | 0.030  |
| 7      | 7.587    | 7.680    | 0.124  |

\*\*\* End of Report \*\*\*

COSMIC DISCOVERIES @ ILS  
HPLC ANALYSIS REPORT

|                 |                                                |           |           |
|-----------------|------------------------------------------------|-----------|-----------|
| Injection Date  | : Wed, 3. Oct. 2012                            | Seq Line  | : U       |
| Sample Name     | : ILS-PVB-BR-AN-1A                             | Location  | : Vial 53 |
| Acq Operator    | :                                              | Inj. No.  | : 0       |
| Acq. Method     | : D:\CHEM32\1\METHODS\C-18 A50B50-GM.M         | Inj. Vol. | : 4 µl    |
| Analysis Method | : D:\CHEM32\1\METHODS\C-18 A50B50-GM.M         |           |           |
| Method Info     | : Column : Symmetry C-18 /5*4,6mm 3.5µm        |           |           |
|                 | : Mobile phase: A)0.1% HCOOH in water , B) ACN |           |           |
|                 | : T/B%0/50,1/50,3/98,10/98,10.5/50,12/50       |           |           |
|                 | : Flow:1.0 ml/min, Diluent: ACN:WATER(80:20)   |           |           |

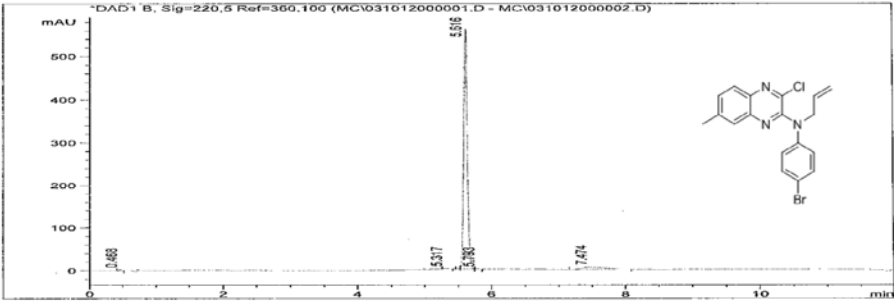

Signal 1: DAD1 B, Sig=220,5 Ref=360,100

| Peak # | RT [min] | Area     | Area % |
|--------|----------|----------|--------|
| 1      | 0.468    | 3.976    | 0.175  |
| 2      | 5.317    | 7.291    | 0.321  |
| 3      | 5.520    | 2.170    | 0.096  |
| 4      | 5.616    | 2115.350 | 93.251 |
| 5      | 5.793    | 2.948    | 0.130  |
| 6      | 7.474    | 136.719  | 6.027  |

\*\*\* End of Report \*\*\*

\*\*\* End of Report \*\*\*

COSMIC DISCOVERIES @ ILS  
HPLC ANALYSIS REPORT

|                 |                                                           |           |           |
|-----------------|-----------------------------------------------------------|-----------|-----------|
| Injection Date  | : Sat, 23. Mar. 2013                                      | Seq Line  | : 21      |
| Sample Name     | : ILS-PVB-B-AN 1                                          | Location  | : Vial 12 |
| Acq Operator    | : VARMA                                                   | Inj. No.  | : 1       |
| Acq. Method     | : D:\CHEM32\1\DATA\220313-EFVNZ L P MC 2013-03-22 18-1->  | Inj. Vol. | : 5 µl    |
| Analysis Method | : D:\CHEM32\1\METHODS\C-18 AS0850-GM.M                    |           |           |
| Method Info     | : Column : Symmetry C-18 75*4.6mm,3.5µm                   |           |           |
|                 | Mobile phase: A) 0.1% HCOOH in Water , B) ACN (gradient ) |           |           |
|                 | T/B%:0/50,0.5/50,4/98,10/98,10.5/50,12/50                 |           |           |
|                 | Flow: 1.0 ml/min, Diluent: ACN:Water(90:10)               |           |           |

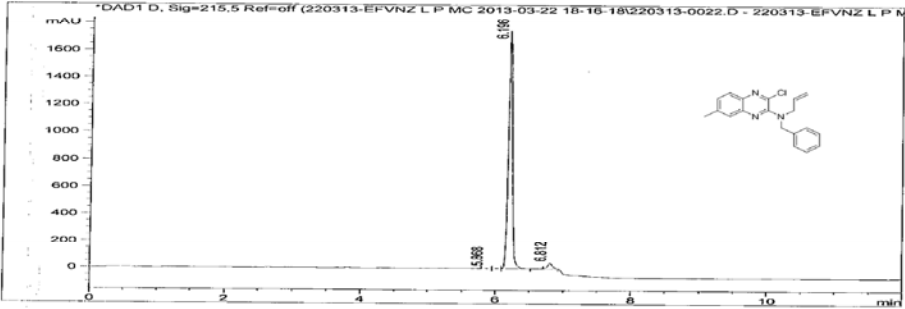

Signal 1: DAD1 D, Sig=215,5 Ref=off

| Peak # | RT [min] | Area     | Area % |
|--------|----------|----------|--------|
| 1      | 4.757    | 4.757    | 0.063  |
| 2      | 5.087    | 5.087    | 0.067  |
| 3      | 6.196    | 7349.091 | 97.301 |
| 4      | 6.812    | 193.985  | 2.568  |

Copies of HPLC

COSMIC DISCOVERIES @ ILS  
HPLC ANALYSIS REPORT

Seq Line : 2

Injection Date : Fri, 7. Sep. 2012 Location : Vial 42

Sample Name : ILS-PVB-AN-1B Inj. No. : 1

Acq Operator : SRI KRISHNA VARMA Inj. Vol. : 4 µl

Acq. Method : D:\Chem32\1\DATA\070912-MC 2012-09-07 18-31-22\C-18 ->

Analysis Method : D:\CHEM32\1\METHODS\C-18 A50B50-GM.M

Method Info : Column : Symmetry C-18 75\*4.6mm 3.5µm

Mobile phase: A) 0.1% HCOOH in water , B) ACN (Isocratic )

T/B%0/50,1/50,3/98,10/98,10.5/50,12/50

Flow:1.0 ml/min, Diluent: ACN:WATER(80:20)

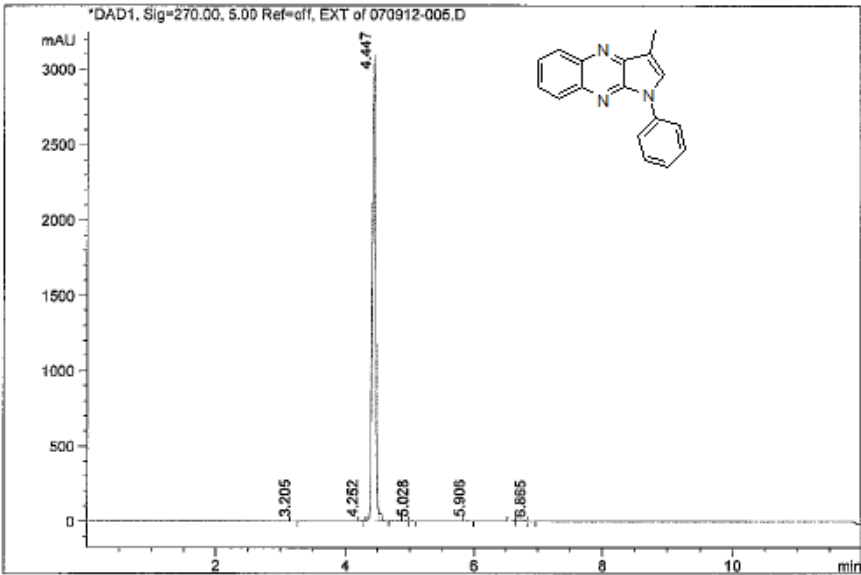

Signal 1: DAD1, Sig=270.00, 5.00 Ref=off, EXT

| Peak # | RT [min] | Area      | Area % |
|--------|----------|-----------|--------|
| 1      | 3.205    | 6.920     | 0.062  |
| 2      | 4.252    | 5.037     | 0.045  |
| 3      | 4.447    | 10914.851 | 97.519 |
| 4      | 4.549    | 160.095   | 1.430  |
| 5      | 4.948    | 5.727     | 0.051  |
| 6      | 5.028    | 4.172     | 0.037  |
| 7      | 5.906    | 8.953     | 0.080  |
| 8      | 6.655    | 12.633    | 0.113  |
| 9      | 6.734    | 69.287    | 0.619  |
| 10     | 6.865    | 4.841     | 0.043  |

COSMIC DISCOVERIES @ ILS  
HPLC ANALYSIS REPORT

Injection Date : Tue, 21. Aug. 2012 Seq Line : 0  
Sample Name : ILS-KSK-03-PVB-ALK-2 Location : Vial 1  
Acq Operator : SRI KRISHNA VARMA Inj. No. : 0  
Acq. Method : D:\CHEM32\1\METHODS\C-18 AS0B50-GM.M Inj. Vol. : 5 µl  
Analysis Method : D:\CHEM32\1\METHODS\C-18 AS0B50-GM.M  
Method Info : Column : Symmetry C-18 75\*4.6mm 3.5µm  
Mobile phase: A) 0.1% HCOOH in water , B) ACN (gradient )  
T/B%:0/50,1.0/50,4/98,10/98,10.5/50,12/50  
Flow:1.0 ml/min Diluent: ACN:WATER(80:20)

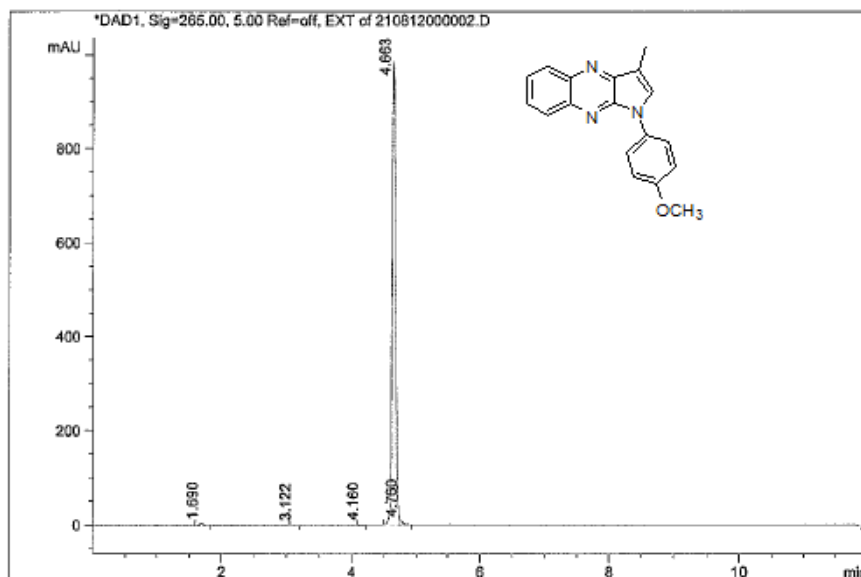

Signal 1: DAD1, Sig=265.00, 5.00 Ref=off, EXT

| Peak # | RT [min] | width [min] | Area     | Area % | Name |
|--------|----------|-------------|----------|--------|------|
| 1      | 1.690    | 0.064       | 10.315   | 0.291  |      |
| 2      | 3.122    | 0.066       | 1.174    | 0.033  |      |
| 3      | 4.160    | 0.055       | 3.283    | 0.093  |      |
| 4      | 4.663    | 0.059       | 3508.999 | 99.001 |      |
| 5      | 4.760    | 0.042       | 20.638   | 0.582  |      |

\*\*\* End of Report \*\*\*



COSMIC DISCOVERIES @ ILS  
HPLC ANALYSIS REPORT

Seq Line : 0  
Injection Date : Mon, 27. Aug. 2012 Location : Vial 84  
Sample Name : ILS-PVB-METH-1B Inj. No. : 0  
Acq Operator : SRI KRISHNA VARMA Inj. Vol. : 5 µl  
Acq. Method : D:\CHEM32\1\METHODS\C-18 A50B50-GM.M  
Analysis Method : D:\CHEM32\1\METHODS\C-18 A50B50-GM.M  
Method Info : Column : Symmetry C-18 75\*4.6mm 3.5µm  
Mobile phase: A)0.1% HCOOH in water , B) ACN (Isocratic )  
T/B%0/50,1/50,3/98,10/98,10.5/50,12/50  
Flow:1.0 ml/min, Diluent: ACN:WATER(80:20)

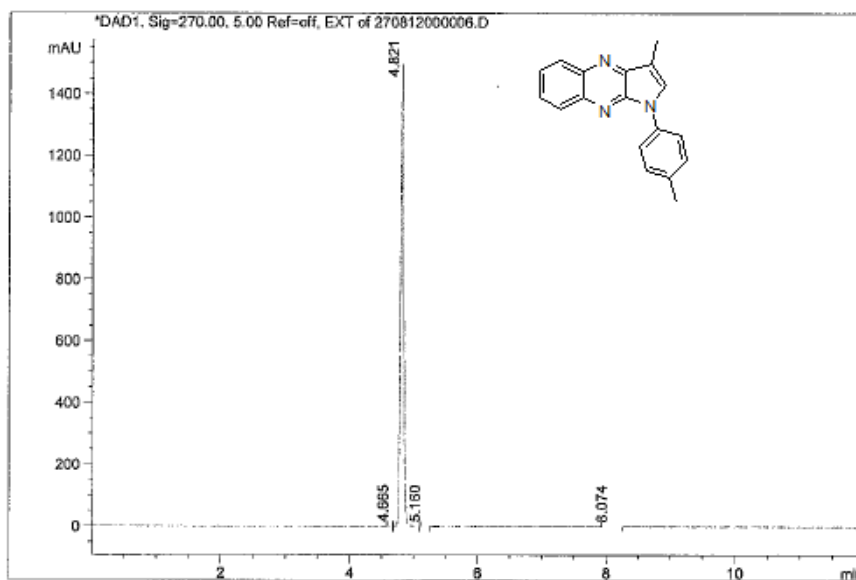

Signal 1: DAD1, Sig=270.00, 5.00 Ref=off, EXT

| Peak # | RT [min] | Area     | Area % |
|--------|----------|----------|--------|
| 1      | 4.665    | 1.695    | 0.034  |
| 2      | 4.821    | 4984.584 | 99.864 |
| 3      | 5.160    | 1.136    | 0.023  |
| 4      | 8.074    | 3.948    | 0.079  |

\*\*\* End of Report \*\*\*

COSMIC DISCOVERIES @ ILS  
HPLC ANALYSIS REPORT

Seq Line : 5  
Injection Date : Mon, 24. Dec. 2012 Location : Vial 47  
Sample Name : ILS-PVB-01-2B Inj. No. : 1  
Acq Operator : VARMA Inj. Vol. : 5 µl  
Acq. Method : D:\Chem32\1\DATA\241212-MC 2012-12-24 11-26-48\C-18 ->  
Analysis Method : D:\CHEM32\1\METHODS\C-18 A50B50-GM.M  
Method Info : Column : Symmetry C-18 75\*4.6mm, 3.5µm  
Mobile phase: A) 0.1% HCOOH in Water , B) ACN (gradient )  
T/B%:0/50,0.5/50,4/98,10/98,10.5/50,12/50  
Flow: 1.0 ml/min, Diluent: ACN:Water(50:50)

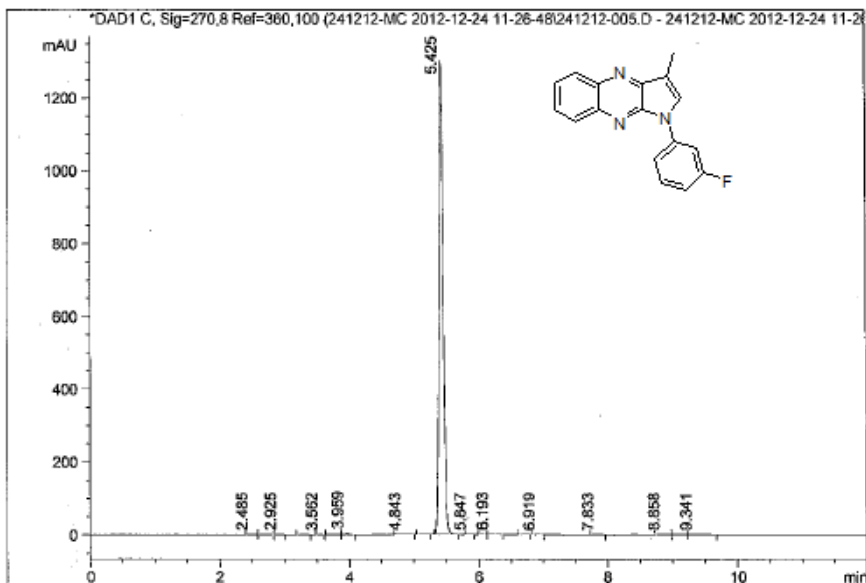

Signal 1: DAD1 C, Sig=270,8 Ref=360,100

| Peak # | RT [min] | Area     | Area % |
|--------|----------|----------|--------|
| 1      | 2.485    | 3.704    | 0.061  |
| 2      | 2.689    | 10.388   | 0.170  |
| 3      | 2.925    | 4.224    | 0.069  |
| 4      | 3.307    | 5.357    | 0.088  |
| 5      | 3.562    | 1.051    | 0.017  |
| 6      | 3.699    | 8.307    | 0.136  |
| 7      | 3.959    | 17.616   | 0.288  |
| 8      | 4.843    | 7.439    | 0.122  |
| 9      | 5.132    | 5.683    | 0.093  |
| 10     | 5.425    | 6004.054 | 98.176 |
| 11     | 5.847    | 1.286    | 0.021  |
| 12     | 6.067    | 3.913    | 0.064  |

COSMIC DISCOVERIES @ ILS  
HPLC ANALYSIS REPORT

Injection Date : Wed, 5. Sep. 2012      Seq Line : 0  
Sample Name : ILS-PVB-F-1A      Location : Vial 31  
Acq Operator : SRI KRISHNA VARMA      Inj. No. : 0  
Acq. Method : D:\CHEM32\1\METHODS\C-18 A50B50-GM.M      Inj. Vol. : 2 µl  
Analysis Method : D:\CHEM32\1\METHODS\C-18 A50B50-GM.M  
Method Info : Column : Symmetry C-18 75\*4.6mm 3.5µm  
Mobile phase: A) 0.1% HCOOH in water , B) ACN (Isocratic )  
T/B%0/50,1/50,3/98,10/98,10.5/50,12/50  
Flow:1.0 ml/min, Diluent: ACN:WATER(80:20)

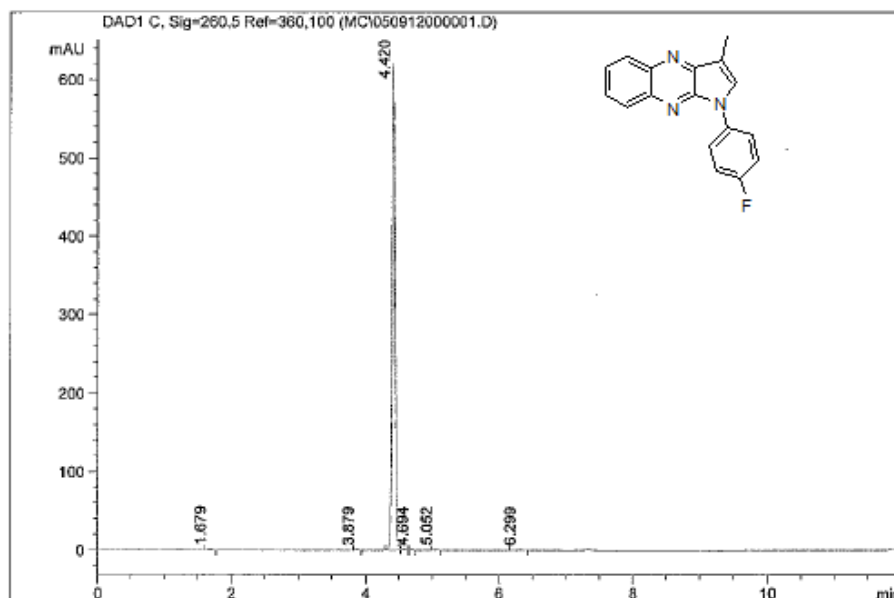

Signal 1: DAD1 C, Sig=260,5 Ref=360,100

| Peak # | RT [min] | Area     | Area % |
|--------|----------|----------|--------|
| 1      | 1.679    | 3.029    | 0.153  |
| 2      | 3.879    | 1.284    | 0.065  |
| 3      | 4.420    | 1954.677 | 98.979 |
| 4      | 4.548    | 7.296    | 0.369  |
| 5      | 4.694    | 2.074    | 0.105  |
| 6      | 5.052    | 1.881    | 0.095  |
| 7      | 6.299    | 4.590    | 0.232  |

\*\*\* End of Report \*\*\*

COSMIC DISCOVERIES @ ILS  
HPLC ANALYSIS REPORT

```

Injection Date   : Fri, 16. Nov. 2012          Seq Line   :           0
Sample Name     : ILS-GDR-PVB-Cl-1B          Location    :        Vial 1
Acq. Operator   : VARMA                      Inj. No.    :           0
Acq. Method     : D:\CHEM32\1\METHODS\C-18 A80B20G.M Inj. Vol.   :         5 µl
Analysis Method : D:\CHEM32\1\METHODS\C-18 A80B20G.M
Method Info     : Column:Symmetry C-18 75*4.6mm, 3.5µ
                  Mobile phase: A) 0.1% HCOOH in water,B) ACN (GRADIENT)   T/
                  B%:0/20,0.5/20,3/98,10/98,10.5/20,12/20
                  Flow:1.0 ml/min Diluent: ACN:Water(80:20)
  
```

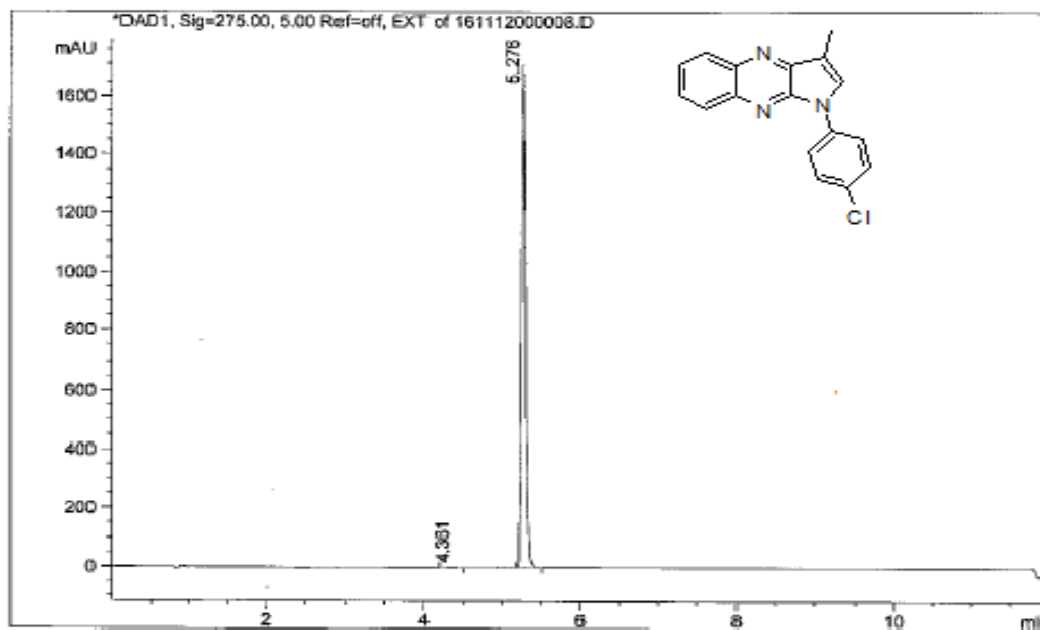

Signal 1: DAD1, Sig=275.00, 5.00 Ref=off, EXT

| [Peak] | RT    | Area     | Area % |
|--------|-------|----------|--------|
| [ # ]  | [min] |          |        |
| 1      | 4.361 | 11.335   | 0.179  |
| 2      | 5.276 | 6323.533 | 99.821 |

\*\*\* End of Report \*\*\*

COSMIC DISCOVERIES @ ILS  
HPLC ANALYSIS REPORT

Injection Date : Sat, 22. Sep. 2012      Seq Line : 14  
Sample Name : ILS-PVB-BA-1B      Location : Vial 76  
Acq Operator : SRI KRISHNA VARMA      Inj. No. : 1  
Acq. Method : D:\Chem32\1\DATA\220912-MC 2012-09-22 10-09-18\C-18 ->  
Analysis Method : D:\CHEM32\1\METHODS\C-18 A50B50-GM.M  
Method Info : Column : Symmetry C-18 75\*4.6mm 3.5µm  
Mobile phase: A)0.1% HCOOH in water , B) ACN (Isocratic )  
T/B%0/50,1/50,3/98,10/98,10.5/50,12/50  
Flow:1.0 ml/min, Diluent: ACN:WATER(80:20)

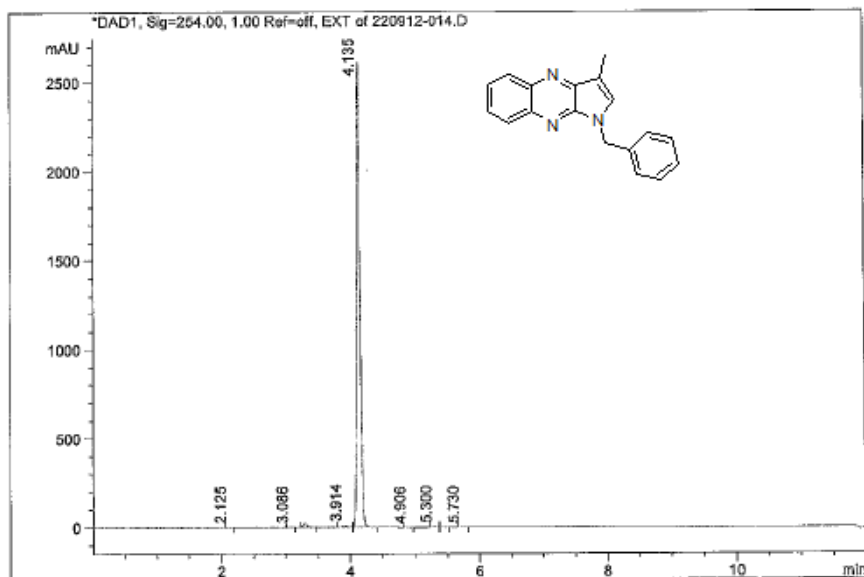

Signal 1: DAD1, Sig=254.00, 1.00 Ref=off, EXT

| Peak<br># | RT<br>[min] | Area     | Area % |
|-----------|-------------|----------|--------|
| 1         | 2.125       | 1.026    | 0.010  |
| 2         | 3.086       | 1.020    | 0.010  |
| 3         | 3.303       | 92.213   | 0.942  |
| 4         | 3.914       | 44.204   | 0.451  |
| 5         | 4.135       | 9639.996 | 98.447 |
| 6         | 4.906       | 1.030    | 0.011  |

COSMIC DISCOVERIES @ ILS  
HPLC ANALYSIS REPORT

Injection Date : Fri, 5. Oct. 2012      Seq Line : 0  
Sample Name : ILS-PVB-1-AN-1B      Location : Vial 11  
Acq Operator : VARMA      Inj. No. : 0  
Acq. Method : D:\CHEM32\1\METHODS\C-18 A50B50-GM.M      Inj. Vol. : 5 µl  
Analysis Method : D:\CHEM32\1\METHODS\C-18 A50B50-GM.M  
Method Info : Column : Symmetry C-18 75\*4.6mm 3.5µm  
Mobile phase: A) 0.1% HCOOH in water , B) ACN  
T/B%0/50,1/50,3/98,10/98,10.5/50,12/50  
Flow:1.0 ml/min, Diluent: ACN:WATER(80:20)

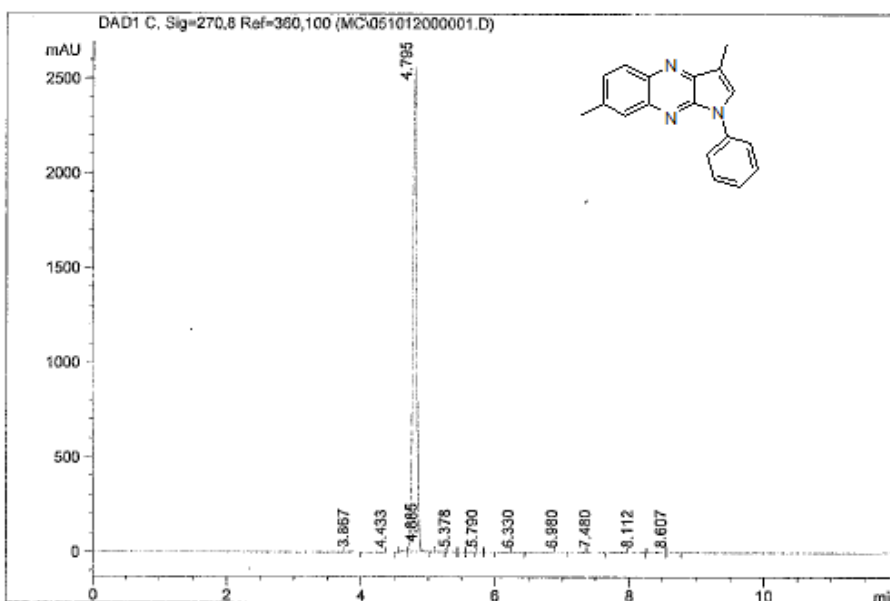

Signal 1: DAD1 C, Sig=270,8 Ref=360,100

| Peak # | RT [min] | Area      | Area % |
|--------|----------|-----------|--------|
| 1      | 3.867    | 2.896     | 0.027  |
| 2      | 4.433    | 0.469     | 0.004  |
| 3      | 4.617    | 18.977    | 0.174  |
| 4      | 4.795    | 10806.105 | 98.954 |
| 5      | 4.885    | 40.885    | 0.374  |
| 6      | 5.160    | 5.542     | 0.051  |
| 7      | 5.378    | 1.541     | 0.014  |
| 8      | 5.512    | 3.021     | 0.028  |
| 9      | 5.557    | 1.342     | 0.012  |
| 10     | 5.790    | 0.293     | 0.003  |
| 11     | 5.881    | 0.525     | 0.005  |
| 12     | 6.330    | 0.882     | 0.008  |

COSMIC DISCOVERIES @ ILS  
HPLC ANALYSIS REPORT

Injection Date : Mon, 1. Oct. 2012      Seq Line : 6  
Sample Name : ILS-PVB-M-AN-1B      Location : Vial 56  
Acq Operator :      Inj. No. : 1  
Acq. Method : D:\Chem32\1\DATA\011012-MC 2012-10-01 12-18-03\C-18 ->      Inj. Vol. : 3 µl  
Analysis Method : D:\CHEM32\1\METHODS\C-18 A50B50-GM.M  
Method Info : Column : Symmetry C-18 75\*4.6mm 3.5µm  
Mobile phase: A)0.1% HCOOH in water , B) ACN  
T/B%0/50,1/50,3/98,10/98,10.5/50,12/50  
Flow:1.0 ml/min, Diluent: ACN:WATER(80:20)

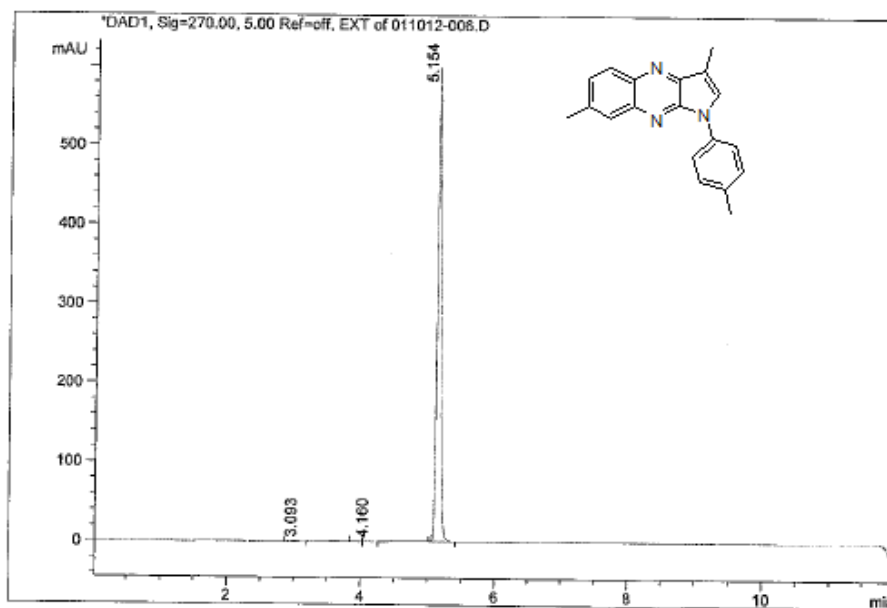

Signal 1: DAD1, Sig=270.00, 5.00 Ref=off, EXT

| Peak # | RT [min] | Area     | Area % |
|--------|----------|----------|--------|
| 1      | 3.093    | 1.541    | 0.064  |
| 2      | 3.961    | 1.340    | 0.056  |
| 3      | 4.160    | 1.043    | 0.044  |
| 4      | 5.154    | 2387.961 | 99.836 |

COSMIC DISCOVERIES @ ILS  
HPLC ANALYSIS REPORT

Injection Date : Wed, 28. Nov. 2012      Seq Line : 3  
Sample Name : ILS-PVB-MO-AN-1B      Location : Vial 3  
Acq Operator : VARMA      Inj. No. : 1  
Acq. Method : D:\Chem32\1\DATA\SEQUENCE\2811112-MC 2012-11-28 18-3->      Inj. Vol. : 5 µl  
Analysis Method : D:\CHEM32\1\METHODS\C-18 A50B50-GM.M  
Method Info : Column : Symmetry C-18 75\*4.6mm, 3.5µm  
Mobile phase: A) 0.1% HCOOH in Water , B) ACN (gradient )  
T/B%:0/50,0.5/50,3/95,10/95,10.5/50,12/50  
Flow: 1.0 ml/min, Diluent: ACN:Water(90:10)

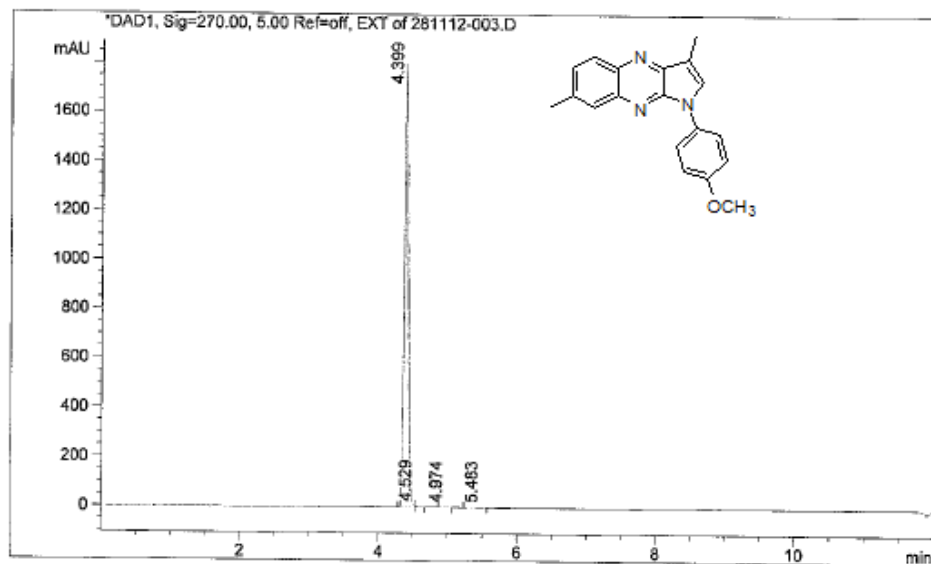

Signal 1: DAD1, Sig=270.00, 5.00 Ref=off, EXT

| Peak # | RT [min] | Area     | Area % |
|--------|----------|----------|--------|
| 1      | 4.399    | 7025.646 | 99.827 |
| 2      | 4.529    | 7.911    | 0.112  |
| 3      | 4.974    | 1.897    | 0.027  |
| 4      | 5.483    | 2.356    | 0.033  |

\*\*\* End of Report \*\*\*



COSMIC DISCOVERIES @ ILS  
HPLC ANALYSIS REPORT

Seq Line : 5  
Injection Date : Mon, 1. Oct. 2012 Location : Vial 55  
Sample Name : ILS-PVB-BR-AN-1B Inj. No. : 1  
Acq Operator : Inj. Vol. : 3 µl  
Acq. Method : D:\Chem32\1\DATA\011012-MC 2012-10-01 12-18-03\C-18 ->  
Analysis Method : D:\CHEM32\1\METHODS\C-18 A50B50-GM.M  
Method Info : Column : Symmetry C-18 75\*4.6mm 3.5µm  
Mobile phase: A)0.1% HCOOH in water , B) ACN  
T/B%0/50,1/50,3/98,10/98,10.5/50,12/50  
Flow:1.0 ml/min, Diluent: ACN:WATER(80:20)

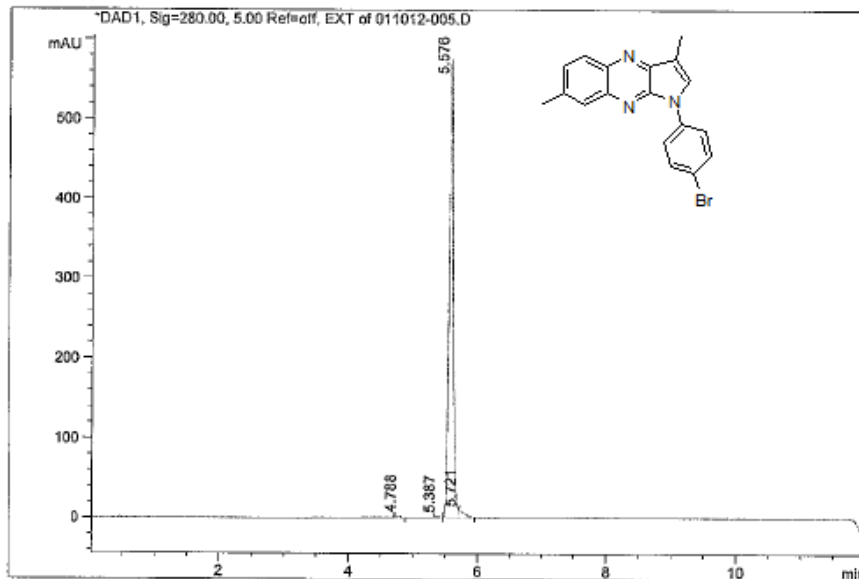

Signal 1: DAD1, Sig=280.00, 5.00 Ref=off, EXT

| Peak # | RT [min] | Area     | Area % |
|--------|----------|----------|--------|
| 1      | 4.788    | 6.126    | 0.233  |
| 2      | 5.387    | 1.792    | 0.068  |
| 3      | 5.576    | 2579.338 | 98.073 |
| 4      | 5.721    | 42.752   | 1.626  |

COSMIC DISCOVERIES @ ILS  
HPLC ANALYSIS REPORT

Injection Date : Fri, 2. Nov. 2012      Seq Line : 7  
Sample Name : ILS-PVB-1-F-1B      Location : Vial 10  
Acq Operator : VARMA      Inj. No. : 1  
Acq. Method : D:\Chem32\1\DATA\021112-MC 2012-11-02 18-14-39\C-18 ->      Inj. Vol. : 3 µl  
Analysis Method : D:\CHEM32\1\METHODS\C-18 A50B50-GM.M  
Method Info : Column : Symmetry C-18 75\*4.6mm 3.5µm  
Mobile phase: A)0.1% HCOOH in water , B) ACN  
T/B%0/50,0.5/50,3/98,10/98,10.5/50,12/50  
Flow:1.0 ml/min, Diluent: ACN:Water(90:10)

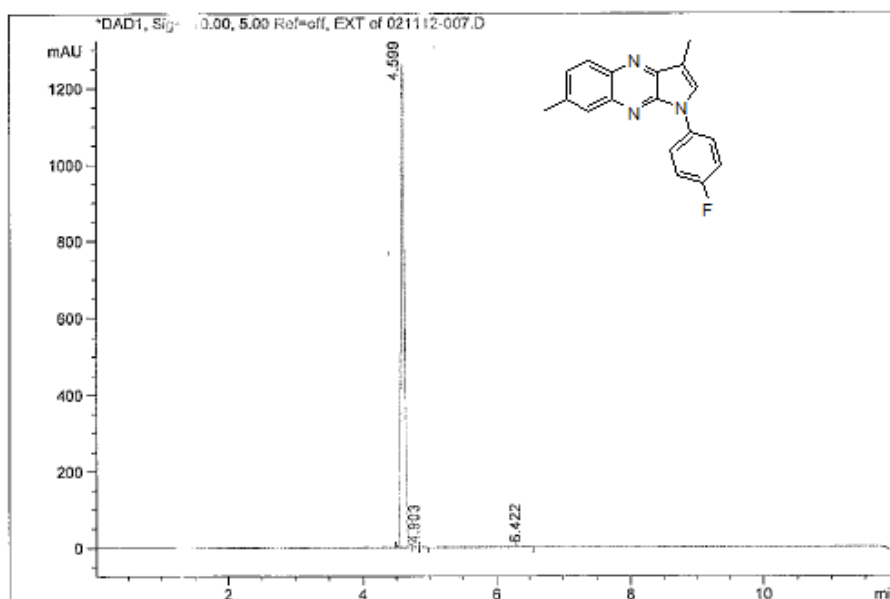

Signal 1: DAD1, Sig=270.00, 5.00 Ref=off, EXT

| Peak # | RT [min] | Area     | Area % |
|--------|----------|----------|--------|
| 1      | 4.199    | 4672.970 | 99.625 |
| 2      | 4.754    | 10.981   | 0.234  |
| 3      | 4.193    | 1.870    | 0.040  |
| 4      | 6.422    | 4.739    | 0.101  |

COSMIC DISCOVERIES @ ILS  
HPLC ANALYSIS REPORT

Injection Date : Thu, 25. Oct. 2012      Seq Line : 3  
Sample Name : ILS-PVB-B-AN-1B      Location : Vial 5  
Acq Operator : VARMA      Inj. No. : 1  
Acq. Method : D:\Chem32\1\DATA\251012-MC 2012-10-25 15-40-35\C-18 ->      Inj. Vol. : 5 µl  
Analysis Method : D:\CHEM32\1\METHODS\C-18 A50B50-GM.M  
Method Info : Column : Symmetry C-18 75\*4.6mm 3.5µm  
Mobile phase: A)0.1% HCOOH in water , B) ACN  
T/B%0/50,1/50,3/98,10/98,10.5/50,12/50  
Flow:1.0 ml/min, Diluent: ACN:Water(90:10)

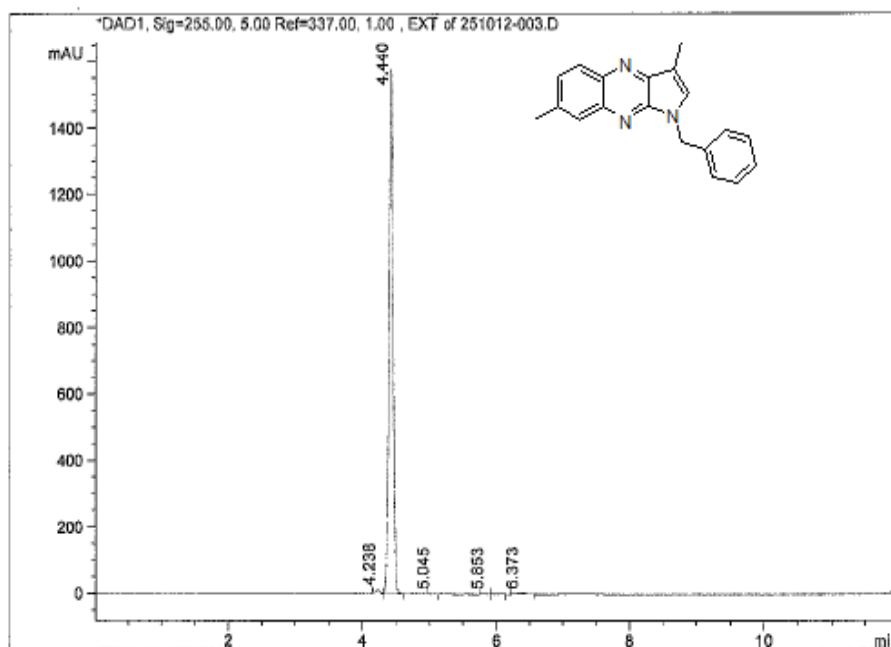

Signal 1: DAD1, Sig=255.00, 5.00 Ref=337.00, 1.00 , EXT

| Peak # | RT [min] | Area     | Area % |
|--------|----------|----------|--------|
| 1      | 4.238    | 43.819   | 0.628  |
| 2      | 4.440    | 6887.677 | 98.742 |
| 3      | 5.045    | 4.593    | 0.066  |
| 4      | 5.853    | 7.557    | 0.108  |
| 5      | 6.002    | 11.086   | 0.159  |
| 6      | 6.373    | 20.693   | 0.297  |
